1 **Title: A newly identified group of P-like (PL) fimbriae from extra-intestinal**  
2 **pathogenic *Escherichia coli* (ExPEC) encode distinct adhesin subunits and**  
3 **mediate adherence to host cells.**

4

5 Running title: New group of Pap-like (PL) fimbriae in *E. coli*

6 **Hajer Habouria<sup>1,2</sup>, Hicham Bessaiah<sup>1,2</sup>, Julie Buron<sup>1,2</sup>, Sébastien Houle<sup>1,2</sup>, and Charles**  
7 **M. Dozois<sup>1,2</sup> \***

8 <sup>1</sup>INRS-Centre Armand-Frappier Santé Biotechnologie, Laval, Québec, Canada

9 <sup>2</sup>CRIPA-Centre de recherche en infectiologie porcine et avicole, Saint-Hyacinthe, Québec,  
10 Canada

11 \* Corresponding author:

12 Charles M. Dozois

13 Institut national de la recherche scientifique

14 INRS-Centre Armand-Frappier Santé Biotechnologie

15 531 boul des Prairies

16 Laval, Quebec

17 CANADA, H7V 1B7

18 E-mail: [charles.dozois@inrs.ca](mailto:charles.dozois@inrs.ca)

19 **Keywords:** fimbriae, pili, pathogenic *E. coli*, hemagglutination, biofilm, adherence, urinary  
20 tract infection, poultry

21

22 **Abstract:**

23 Fimbrial adhesins play a critical role for bacterial adherence and biofilm formation.  
24 Sequencing of avian pathogenic *Escherichia coli* (APEC) strain QT598 identified a fimbrial  
25 gene cluster belonging to the  $\pi$  group that we named PL (P-like) fimbriae, since genetic  
26 organization and sequence are similar to Pap and related fimbriae. Screening of genomic  
27 databases indicated that genes encoding PL fimbriae located on IncF plasmids are present in a  
28 diversity of *E. coli* isolates from poultry, human systemic infections, and other sources. As  
29 with P fimbriae, PL fimbriae exhibit sequence divergence in adhesin encoding genes, and  
30 strains could be divided into 5 classes based on differences in sequences of the PlfG adhesin  
31 protein. The *plf* genes from two predominant PlfG adhesin classes, PlfG-I and PlfG-II were  
32 cloned. PL fimbriae were visualized by electron microscopy, promoted biofilm formation,  
33 demonstrated distinct hemagglutination profiles and promoted adherence to human bladder  
34 and kidney epithelial cell lines. Hybrid fimbriae comprised of genes from *plf*<sub>QT598</sub> wherein  
35 *plfG* was replaced by *papG* encoding adhesin genes were also shown to be functional and  
36 mediate adherence to epithelial cells, further indicating similarity and functional compatibility  
37 between these two types of fimbriae. Although deletion of *plf* genes did not significantly  
38 reduce colonization of the mouse urinary tract, *plf* gene expression was increased over 40-fold  
39 in the bladder compared to during in vitro culture. Overall, PL fimbriae represent a new group  
40 of fimbriae demonstrating both functional differences and similarities to P fimbriae and may  
41 contribute to adherence to cells and colonization of host tissues.

42

43 **Importance:** Fimbriae are important colonization factors in many bacterial species. The  
44 identification of a new type of fimbriae encoded on some IncF plasmids in *E. coli* was  
45 investigated. Genomic sequences demonstrated these fimbrial gene clusters have genetic  
46 diversity, particularly in the adhesin encoding PlfG gene. Functional studies demonstrated  
47 differences in hemagglutination specificity, although both types of Plf adhesin under study  
48 mediated adherence to human urinary epithelial cells. Such fimbriae may represent previously  
49 unrecognized adhesins that could contribute to host specificity and tissue tropism of some *E.*  
50 *coli* strains.

51

## 52 **Introduction**

53 Bacterial adherence to surfaces is an important survival mechanism. Attachment to  
54 host cells or extracellular matrix can provide access to specific niches and promote  
55 colonization of host tissues. Adhesins can also mediate biofilm formation through bacteria-  
56 bacteria associations and improve survival in the environment. Bacterial adhesins include  
57 hair-like appendages (fimbriae or pili) as well as other molecules, including proteins or  
58 polysaccharides, which are displayed on the cell surface (Soto *et al.*, 1999). Many types of  
59 fimbriae (pili) in Gram-negative bacteria are assembled by the chaperone/usher pathway  
60 (CUP) (Nuccio *et al.*, 2007, Werneburg *et al.*, 2018). In *Escherichia coli*, numerous types of  
61 CUP fimbriae have been identified and characterized. Pathogenic *E. coli* often can produce  
62 multiple types of fimbrial adhesins, and genomic analyses indicate that some strains may  
63 contain 10 or more fimbrial gene clusters (Werneburg *et al.*, 2018, Wurpel *et al.*, 2013). The  
64 ability to produce a variety of adhesins can provide a fitness advantage by expanding potential  
65 host receptor targets, or promoting adherence to environmental substrates.

66 Two main types of fimbriae, type 1 and P fimbriae, from *E. coli* have been extensively  
67 investigated to determine aspects of their roles in disease, particularly urinary tract infections  
68 (Ambite *et al.*, 2019, Connell *et al.*, 1996, Sokurenko *et al.*, 1992), as well as molecular  
69 aspects of biogenesis and assembly of these structures (Lillington *et al.*, 2014). Type 1  
70 fimbriae mediate adherence to mannose-containing receptors, and have been shown to be  
71 critical for virulence of extraintestinal pathogenic *E. coli* (ExPEC) including *E. coli* strains  
72 causing urinary tract infections (Gunther *et al.*, 2002), and neonatal meningitis (Khan *et al.*,  
73 2007). P fimbriae were first described in uropathogenic *E. coli* (UPEC) and were named  
74 based on receptor affinities for P blood group oligosaccharides, and were also described as  
75 Pyelonephritis-associated pili (Pap), since these fimbriae were more associated with *E. coli*  
76 strains from cases of pyelonephritis (Plos *et al.*, 1990). P fimbriae have also been identified in

77 other ExPEC including *E. coli* associated with systemic infections in swine (Dezfulian *et al.*,  
78 2003) and some strains of avian pathogenic *E. coli* (APEC) (Dozois *et al.*, 1995,  
79 Kariyawasam *et al.*, 2006, Mellata *et al.*, 2003, van den Bosch *et al.*, 1993). The P fimbrial  
80 gene clusters are commonly located on horizontally-acquired chromosomal regions, that have  
81 been termed pathogenicity islands (Blum *et al.*, 1995, Guyer *et al.*, 1998, Kariyawasam *et al.*,  
82 2006).

83 The P fimbrial gene cluster comprises 11 genes including regulatory genes (*papI* and  
84 *papB*) and genes dedicated to fimbrial assembly and structure (*papAHCDKJEF*G). The *papA*  
85 gene encodes the major fimbrial subunit, and has been used to class P fimbriae into  
86 serological variants (F7<sub>1</sub>, F7<sub>2</sub> through F16) (Johnson *et al.*, 2000). The adhesin-specificity of  
87 P-fimbriae is mediated by the *papG* gene product. The G adhesins of P fimbriae were grouped  
88 into 3 major classes based on sequence differences and receptor specificity to different  
89 Gal( $\alpha$ 1-4)Gal-containing glycolipids (Marklund *et al.*, 1992, Stromberg *et al.*, 1990). PapGI  
90 recognize globotriaosylceramide or GbO3, PapGII recognize globotetraosylceramide (GbO4)  
91 and PapGIII or PrsGIII recognize galactosylgloboside (GbO5). These glycolipid receptors are  
92 usually found on the surface of red blood cells and on human bladder and kidney cells. A  
93 distinct variant allele, *papG*<sub>BF31</sub>, which was termed as class IV was also reported, although  
94 receptor specificity for this fimbrial adhesin was not described (Manning *et al.*, 2001).

95 P fimbriae are the archetype representatives of the  $\pi$  fimbrial family (Nuccio *et al.*,  
96 2007), that includes a number of other types of *E. coli* fimbriae including Pix fimbriae present  
97 in some UPEC strains (Lugering *et al.*, 2003, Schneider *et al.*, 2004) and Sfp fimbriae  
98 encoded on plasmids in some lineages of enterohemorrhagic *E. coli* (Bielaszewska *et al.*,  
99 2009, Brunder *et al.*, 2001). This report describes a new type of *E. coli* fimbriae from the  $\pi$   
100 group that we have named P-like (PL) fimbriae, since they share sequence similarity and  
101 genetic organization with P fimbriae. The PL fimbriae are distinct from other known members

102 of the  $\pi$  fimbriae and are encoded on IncFIB plasmids containing numerous other virulence  
103 genes associated with ExPEC and APEC strains. As with P fimbriae, PL fimbriae have also  
104 diversified into a number of different G adhesin classes and major subunit variants,  
105 suggesting adaptive potential for host specificity and tissue tropism. We characterized two  
106 different types of PL fimbriae encoding distinct G adhesins, and demonstrate these fimbriae  
107 can mediate adherence to host epithelial cells.

## 108 **Results.**

### 109 **Genomic analysis identifies a new type of fimbriae with a genetic organization** 110 **similar to P fimbriae.**

111 Previously, we reported that ExPEC strain QT598, originally isolated from an infected  
112 turkey, contains a large ColV-type virulence plasmid, pEC598, that encodes a novel  
113 autotransporter protein, the serine-protease hemagglutinin autotransporter, Sha (Habouria *et*  
114 *al.*, 2019). The region adjacent to the *sha* gene on pEC598 encodes a fimbrial gene cluster  
115 (Fig. 1). Due to the close protein identity and genetic organization with P fimbriae (see  
116 below), we have named these genes *plf* (for **P**-**l**ike **f**imbriae) and called these adhesins PL  
117 fimbriae. The *plf* gene cluster is inserted beside a site-specific integrase gene located adjacent  
118 to the REP FIB region on the pEC598 plasmid (Fig. 1). The REPFIB region and *intM*  
119 integrase genes are also present in most IncFII plasmids, and are also commonly flanked by  
120 other predicted virulence genes such as *mig14*, *hlyF*, and *ompT* in other APEC virulence  
121 plasmids, suggesting this conserved region may have led to acquisition of different genes  
122 through integration/recombination. Interestingly, this region of F and related plasmids is  
123 considered a « hot spot » for insertion of a diversity of virulence and antibiotic resistance  
124 genes, that have been termed « cargo genes » (Fig. 1) (Koraimann, 2018).

125 Fimbriae have been classed into specific groups by a variety of criteria, including

126 comparison of usher, chaperone, and major fimbrial subunits (Girardeau *et al.*, 2000, Nuccio  
127 *et al.*, 2007). Fimbriae classification using the usher encoding protein sequences has placed P  
128 fimbriae within the  $\pi$  fimbrial clade (Nuccio *et al.*, 2007). Phylogenetic analysis using the  
129 usher proteins indicated that the PL fimbriae also belong to the  $\pi$  fimbrial clade and cluster  
130 with Pix, Sfp and Pap fimbriae (Fig. 2A). Phylogenetic comparison based on the chaperone  
131 proteins also indicated PL fimbriae were most closely related to P, Pix, and Sfp fimbriae  
132 (Supplemental Fig. S1).

133 Girardeau *et al.* (Girardeau *et al.*, 2000) also classified fimbriae based on amino acid  
134 sequence motifs within the major subunit proteins. The subfamily Ic (PapA-like) group which  
135 included PapA variants, SmfA (*Serratia marscesens*), PmpA (*Proteus mirabilis*) and MrpA  
136 (*Proteus mirabilis*) also includes PixA, SfpA, and PlfA major subunit proteins that share a  
137 conserved sequence signature motif in segment S1 of the fimbrial subunits:  
138 **(GxG[KT]V[TS]FxG[TS]V[VI]DAP)** (Fig. 2B).

139 The PL fimbriae (*plf*) gene cluster contains 10 genes predicted to encode one  
140 regulatory and 9 structural/assembly proteins that share identity to equivalent proteins present  
141 in the *pap* gene cluster (Fig. 3). A predicted regulatory protein PlfB, shares identity to  
142 members of the PapB regulatory family that includes PapB (P fimbriae), PixB (Pix fimbriae),  
143 FocB/SfaB (F1C/S fimbriae), AfaA (Afa-III adhesin), Daa (F1845 fimbriae), and FanA/FanB  
144 (K99 pili) regulatory proteins (Holden *et al.*, 2001). The highest identity was to PixB (57%  
145 identity / 76% similarity), followed by FanB (47% identity / 69% similarity) and PapB (45%  
146 identity / 67% similarity). No equivalent of the PapI regulatory gene was present. Some Plf  
147 proteins show higher identity to other *pap*-related fimbrial gene clusters, specifically from Pix  
148 fimbriae, identified in some *E. coli* urinary tract infection isolates (Lugering *et al.*, 2003,  
149 Schneider *et al.*, 2004), and the plasmid-encoded Sfp fimbriae, present in sorbitol-fermenting  
150 diarrheagenic *E. coli* O157:H7 strains (Bielaszewska *et al.*, 2009, Brunder *et al.*, 2001) (Fig.

151 3). Despite demonstrating higher identity to certain proteins from these other fimbriae, only  
152 Plf demonstrates a complete set of structural/assembly proteins equivalent to each in the *pap*  
153 gene cluster, as Pix and Sfp fimbriae both lack PapE or PapK protein paralogs, which are  
154 known to code for a fibrillum subunit and adaptor protein respectively (Fig. 3). The gene  
155 products showing the greatest degree of diversity among these fimbrial protein paralogs were  
156 the G adhesins that exhibited less than 30% identity. Taken together, the PL fimbrial system  
157 is highly similar to Pix and Sfp fimbrial systems, but shares a genetic organization more akin  
158 to P fimbriae, as it includes the PapK and PapE paralogous proteins PlfK and PlfE predicted  
159 to be part of a thin fibrillum structure.

#### 160 **PL fimbrial gene clusters contain different types of G adhesins**

161 To best identify potential fimbrial genes that are very closely related to the Plf system  
162 of strain QT598, alignment searches of the NCBI database were done against the predicted  
163 adhesin encoding gene product, PlfG, using a cut-off of >90% amino acid identity. The search  
164 revealed 105 samples (104 *E. coli* and one *E. albertii* strain) containing a *pflG* allele with high  
165 identity to PlfG<sub>QT598</sub>. Interestingly, among the sample sources, a majority were isolated from  
166 avian species as well as clinical isolates from urine or extraintestinal infections in humans  
167 (Table S1). However, some samples were also from a variety of livestock, healthy human  
168 fecal samples, exotic zoo animal fecal samples and environmental sources. Blast analyses  
169 against PlfG<sub>QT598</sub> also identified a series of proteins demonstrating from 44% to 77% identity  
170 to PlfG that were all associated with fimbrial gene clusters belonging to the Plf family, since  
171 these fimbrial gene clusters shared the same genetic organization as the *pfl* gene cluster and  
172 had highly conserved identity (>94%) with the PlfD<sub>QT598</sub> gene products (data not shown).  
173 Based on sequences in the database and identification of entries containing enough sequence  
174 data to span the length of the fimbrial gene clusters, a phylogenetic analysis of distinct protein  
175 entries for different PlfG adhesins was determined. In all, 21 protein entries sharing identity



176 with PlfG were identified (Fig. 4). Analysis determined 5 distinct clades of the PlfG adhesins,  
177 including a group (class V) specific to some *Cronobacter* spp. The number of individual  
178 entries from the sequence database indicated that PlfG class I and PlfG class II families were  
179 predominant, whereas PlfG classes III to V were represented by only a few individual strains  
180 in the sequence database (Fig. 4). All of the *plf* gene clusters identified from *E. coli* strains  
181 regardless of G adhesin class were inserted adjacent to a site-specific integrase and REP FIB  
182 region (data not shown), suggesting that these fimbrial systems are likely to be plasmid  
183 encoded. Taken together, these results suggest that *plf* gene clusters are present in numerous  
184 *E. coli* strains and that the G adhesins of these fimbriae have diversified into distinct alleles.

185 Phylogenetic analysis based on the comparison of the PlfG adhesin sequences in the  
186 database demonstrated that two main classes of PlfG adhesins, class I and class II are  
187 predominant in sampled genomes. Specific Blast comparisons of the PlfG class II adhesin  
188 from *E. coli* strain QT598 with a representative encoding the Class I adhesin, from strain  
189 UMEA-3703-1, showed a 45% identity / 65% similarity. This sequence divergence is similar  
190 to the difference between P fimbriae class I and class II G adhesins (46% identity / 64%  
191 similarity). As such, and since these two PlfG classes are the most common in the database,  
192 we cloned both of them for further investigation.

### 193 **The *plf* class I and II gene clusters encode fimbriae with distinct hemagglutin** 194 **activity**

195 To demonstrate that the *plf* encoding clones produced fimbriae, the plasmids encoding  
196 *plf* genes were transformed into the afimbriated *E. coli* K-12 strain ORN172. Transmission  
197 electron microscopy (TEM) demonstrated that both *plf*<sub>QT598</sub> and *plf*<sub>UMEA-3703-1</sub> containing  
198 plasmids produced peritrichous fimbrial filaments at the surface of cells of strain ORN172

199 (Fig. 5). By contrast, ORN172 containing the empty vector did not produce any fimbriae, as  
200 expected.

201 P fimbrial adhesins are known to be mannose-resistant hemagglutinins and they  
202 demonstrate lectin activity specific to Gal( $\alpha$ 1-4)Gal-containing glycolipids present on the  
203 surface of erythrocytes and other host cells. To compare the hemagglutination activity of P-  
204 fimbriae reference clones with clones producing PL fimbriae, we tested hemagglutination  
205 activity of fimbriae expressing clones in the non-fimbriated *E. coli* strain ORN172 for a  
206 variety of erythrocytes from different species (Fig. 6). The reference clone encoding P  
207 fimbriae with the PapG class I adhesin from *E. coli* J96 (pPap5) demonstrated strong  
208 hemagglutinin activities with human, pig, dog, and rabbit erythrocytes. The reference clone  
209 encoding P fimbriae containing the Pap class II adhesin from *E. coli* IA2 (pDC5) strongly  
210 agglutinated pig and human erythrocytes and, to a lesser extent, sheep and chicken  
211 erythrocytes. The reference clone encoding Prs fimbriae with the PapG class III (PrsG)  
212 adhesin from uropathogenic *E. coli* J96 (pJFK102) agglutinated dog, pig, and sheep  
213 erythrocytes. The clone encoding PL fimbriae containing a Plf class I adhesin from *E. coli*  
214 UMEA-3703-1 agglutinated a broad range of erythrocytes from all species tested except dog  
215 blood, although HA titers were higher for human and sheep blood. Interestingly, the clone  
216 encoding the Plf class II adhesin from *E. coli* QT598 only strongly agglutinated human and  
217 turkey blood (Fig. 6). Taken together, these results indicate that, as with the P fimbrial classes  
218 of adhesins, PL fimbriae are hemagglutinins and that the PlfG class I and class II adhesins  
219 demonstrate distinct hemagglutination activities compared to the P fimbrial adhesins.

#### 220 **Different Plf and Pap G adhesin alleles can be expressed by PL fimbriae**

221 Since the PlfG class I and II adhesin sequences from *E. coli* strains QT598 and  
222 UMEA-3703-1 respectively are quite distinct from each other and as the *plf* gene clusters

223 share close genetic organization with *pap* gene clusters, we generated chimeric fimbrial gene  
224 clusters encoding different G adhesin alleles. These chimeric clones were based on the  
225 *plf*<sub>QT598</sub> gene cluster by generating a clone lacking the *plfG* gene (pIJ598) and then cloning the  
226 *plfG*<sub>UMEA-3703-1</sub> or *papG* alleles from each of the three PapG adhesin classes (Supplemental  
227 Fig. S2. A and B). Electron microscopy demonstrated that each of the five chimeric clones  
228 introduced to non-fimbriated *E. coli* ORN172, produced fimbriae on the surface of the cells  
229 (Fig 7. A). The PlfA subunit protein was also detected from cell surface extracts as shown in  
230 immunoblots, although the level of protein present was decreased when the *papG*  
231 recombinant alleles were expressed compared to the *plfG*<sub>QT598</sub> and *plfG*<sub>UMEA-3703-1</sub> expressing  
232 clones (Fig. 7. B).

### 233 **PL fimbriae mediate adherence to human epithelial cells**

234 The adherence of bacteria to host epithelial cells such as bladder and kidney cells is an  
235 important step in colonization of the urinary tract. To investigate whether PL fimbriae can  
236 mediate adherence to host cells, we used clones expressing PlfG class I, PlfG class II, PapG  
237 class I, II, or III fimbrial adhesins.

238 All the clones encoding P or PL fimbrial adhesins (reference and chimeric clones)  
239 demonstrated increased adherence to bladder 5637 and kidney HEK-293 epithelial cell lines  
240 compared to the strain containing the empty vector (Fig. 8). The chimeric clones containing  
241 the *plf* gene cluster with hybrid *pap* or *plfG* adhesin encoding genes also promoted adherence  
242 to epithelial cells. However, the clone containing a *plf* gene cluster, lacking the *plfG* or *papG*  
243 gene showed no appreciable adherence compared to the empty vector-containing clone (Fig.  
244 8). These results demonstrate that PL fimbriae producing distinct types of G adhesins can  
245 mediate adherence to urinary tract epithelial cells, and suggest that these fimbriae may  
246 potentially play a role during host colonization.

247 **PL fimbriae promote biofilm production**

248 Since fimbriae can contribute to biofilm production, we tested for biofilm formation in  
249 polystyrene microtiter plates at different temperatures (25°C, 37°C, and 42°C) (Fig. 9). The  
250 clone expressing PL fimbriae with the PlfG class II adhesin showed a high level of biofilm  
251 production at all tested temperatures, even above that of a positive control biofilm forming  
252 *Serratia liquefaciens* (*S. liquefaciens*) reference strain. The clone expressing PL fimbriae with  
253 the PlfG class I adhesin also produced biofilm at 25°C and 37°C at moderate levels compared  
254 to the clone producing the PlfG class II adhesin. However, biofilm production was very low at  
255 42°C. The Pap class I and III producing reference clones were also able to form significantly  
256 more biofilm at 25°C, 37°C, and 42°C than the negative control. The Pap class II expressing  
257 reference clone produced biofilm at higher temperatures (37°C and 42°C), but biofilm levels  
258 were reduced at 25°C.

259 The chimeric clones that expressed different Pap or Plf adhesins fused to the *plf*<sub>QT598</sub>  
260 gene cluster were all able to produce appreciable levels of biofilm at both 25°C and 37°C,  
261 although biofilm was much reduced at 42°C. The clone expressing the *plf*<sub>QT598</sub> gene cluster  
262 lacking a *papG* or *plfG* adhesin encoding gene ( $\Delta$ *plfG* clone) as well as the empty vector were  
263 not able to produce biofilm at all the tested temperatures (Fig. 9). Taken together these results  
264 indicate that PL and P fimbriae expressing different types of G adhesins can mediate biofilm  
265 production in *E. coli* K-12 and that the PlfG class II adhesin in particular can contribute to  
266 strong biofilm formation.

267 **PL fimbrial genes are upregulated in the bladders of infected mice**

268 To investigate the potential role of the PL fimbriae in virulence in the UTI model, 6-  
269 week-old female CBA/J mice were infected with wild type strains QT598 and UMEA-3703-1  
270 or with mutant  $\Delta$ *plf* strains, lacking the genes encoding PL fimbriae. In the mouse infection

271 model, loss of PL fimbriae did not have a significant affect on colonization of the bladder or  
272 kidneys by strain QT598 (Fig 10.A). Strain UMEA-3703-1 and its  $\Delta plf$  mutant also showed  
273 no significant differences in colonization. However, UMEA-3703-1 was only able to colonize  
274 at lower levels ( $10^2$  to  $10^3$  cfu/g) compared to strain QT598 ( $10^5$  to  $10^6$  cfu/g) (Supplemental  
275 Fig. S3). Interestingly, the expression level of  $plf_{QT598}$  was upregulated by more than 40-fold  
276 in the bladder of infected mice when compared to expression following growth in vitro in LB  
277 medium (Fig 10.B). This suggests that the expression of this fimbriae is favored by  
278 environmental cues during infection in the urinary tract.

## 279 Discussion

280 A novel plasmid-encoded fimbrial gene cluster was identified on the large colicin V  
281 plasmid of avian pathogenic *E. coli* strain QT598 (Serotype O1:K1, Sequence type ST1385).  
282 Strains from this and related sequence types such as ST91 are commonly associated with  
283 extra-intestinal infections in poultry and urinary tract infections in humans (Habouria *et al.*,  
284 2019) and (<http://enterobase.warwick.ac.uk/>). The *plf* genes were shown to be adjacent to the  
285 repFIB and *intM* genes on plasmid pEC598. This is a common integration site for a diversity  
286 of genes on F and related plasmids, and collectively this region has been named the « cargo  
287 gene » region (Koraimann, 2018). The cargo gene region has been found to encode a diversity  
288 of accessory genes, insertion sequences, and integrons known to encode genes for resistance  
289 to antimicrobials and metals, microcins, and virulence genes (Koraimann, 2018, Lanza *et al.*,  
290 2014). It is therefore likely that the *plf* fimbrial gene cluster along with other genes was  
291 inherited by certain *E. coli* strains through a recombination/integration event and that it has  
292 since disseminated or been transferred into a diversity of *E. coli* isolates associated with  
293 different host or environmental sources (highlighted in Table S1). As with the P fimbriae, PL  
294 fimbriae have also diversified considerably, and there has been notable divergence in the  
295 sequence of the PlfG adhesin encoding sequences into 5 distinct PlfG adhesin classes (Fig. 4).

296 Such changes may have occurred to promote adherence and colonization to a variety of  
297 surfaces or host cell receptors in different niches or environments.

298 The PL fimbriae are new members of the  $\pi$  fimbrial family, which contains P-fimbria-  
299 like operons present in some Betaproteobacteria and Gammaproteobacteria (Nuccio *et al.*,  
300 2007). More specifically, based on comparison of the fimbrial usher proteins, the PL fimbriae  
301 are part of a subgroup which includes true P fimbriae, as well as closely related Sfp and Pix  
302 fimbriae (Nuccio *et al.*, 2007) (Fig. 2), all of which have been shown to mediate mannose-  
303 resistant hemagglutination (MRHA) of erythrocytes from humans in addition to some distinct  
304 MRHA profiles for erythrocytes from other species. Pix fimbriae, which have been identified  
305 in some uropathogenic *E. coli* strains, were shown to agglutinate human erythrocytes, but not  
306 sheep or goat erythrocytes and do not recognize the Gal-Gal sugars recognized by P fimbriae  
307 (Lugering *et al.*, 2003). Sfp fimbriae also mediate MRHA of human erythrocytes, which was  
308 dependent on the *sfpG* gene (Brunder *et al.*, 2001). However, to our knowledge, no tests for  
309 MRHA for erythrocytes from other species have been reported. Interestingly, the G adhesin  
310 proteins from Pix and Sfp fimbriae share amino acid homology between them (63%  
311 identity/81% similarity), suggesting these G adhesin proteins are more closely related to each  
312 other than to PlfG or PapG adhesins, which share no more than 25% amino acid identity.  
313 Herein, we demonstrated that PL fimbriae producing the class I adhesin mediated MRHA for  
314 erythrocytes from different species including equine, ovine, bovine, rabbit and human  
315 erythrocytes, whereas PL fimbriae producing the class II adhesin mediated MRHA only to  
316 human and turkey erythrocytes (Fig. 6). Taken together, this subgroup of  $\pi$  fimbriae (true P  
317 fimbriae, Sfp, Pix, and PL fimbriae) have developed important differences in adhesin protein  
318 sequences that have expanded the capacity to adhere to a variety of receptors on erythrocytes  
319 and host cells from different species. It will be of interest to more specifically determine the  
320 lectin receptor specificity of this family of fimbriae.

321 The genetic organization of the *plf* gene cluster includes 9 predicted fimbrial subunit  
322 genes, which is the number of predicted structural genes encoding P fimbriae (Fig. 3). By  
323 contrast, both the Sfp and Pix fimbrial gene clusters comprise 7 structural genes, and lack the  
324 genes corresponding to the *papK* and *papE* genes predicted to encode an adaptor and a minor  
325 fimbrial subunit (Fig. 3). From this standpoint, overall, PL fimbriae are most similar to true P  
326 fimbriae.

327 To further demonstrate potential complementarity between P and PL fimbriae, we also  
328 generated hybrid fimbrial gene clusters, wherein the *plfG*<sub>QT598</sub> gene was replaced by PapG  
329 adhesin encoding genes belonging to class I, class II or class III adhesins. Each of these  
330 clones were able to produce functional fimbrial structures that also increased adherence to  
331 human urinary tract epithelial cells. This also further indicates that the PL fimbriae, despite  
332 having adhesins that are quite distinct in amino acid sequence from P fimbriae, also produce  
333 mannose-resistant hemagglutinins that can mediate adherence to human bladder and kidney  
334 cells, and that the bioassembly of these fimbriae are compatible with P fimbrial G adhesins. It  
335 is interesting, however, that the production of the hybrid fimbriae from bacterial cells was  
336 substantially reduced compared to the PL fimbrial clones, suggesting that efficiency of  
337 biogenesis of the hybrid fimbriae is reduced.

338 As with the *plf* gene cluster, the location of the *sfp* genes is also on IncF plasmids, in  
339 close proximity to the repFIB region on the pSFO157 plasmid (Brunder *et al.*, 2001).  
340 However, it is flanked on both sides by insertion sequences that are distinct from the region  
341 adjacent to *plf* genes on pEC598. The Sfp fimbriae were initially found to not be expressed by  
342 EHEC strains under normal laboratory conditions, and properties of these fimbriae were first  
343 determined using cloned fimbrial genes in *E. coli* K-12 (Brunder *et al.*, 2001). The *sfp* genes  
344 encoding a fimbrial system with mannose-resistant hemagglutinin activity have been  
345 identified on a subgroup of sorbitol-fermenting EHEC/STEC strains and some EHEC

346 O165:H25/NM strains from humans and cattle, but are absent from most other types of *E. coli*  
347 (Bielaszewska *et al.*, 2009, Brunder *et al.*, 2001). This suggests that the *sfp* genes were likely  
348 acquired independently by horizontal transfer to both a non-motile sorbitol O157 strain and  
349 independently to an O165:H25/NM strain and have since remained in these branches of  
350 EHEC (Bielaszewska *et al.*, 2009). This is clearly in contrast to the *plf* gene cluster, which is  
351 present in a diversity of *E. coli* strains from multiple sources, and has likely been transferred  
352 either through multiple conjugation and/or recombination events and has also diversified,  
353 since distinct G adhesin classes have emerged among strains.

354 DNA sequence comparisons of gene clusters that are highly similar to the *plf* fimbrial  
355 system of *E. coli* QT598 from nucleotide databases provided a means to identify subgroups of  
356 PL fimbriae encoding 5 distinct classes of PlfG adhesins (Fig. 4). Since the PlfG class I and  
357 class II encoding alleles were predominant among isolates that notably included strains  
358 associated with human extraintestinal infections as well as infections from poultry, we  
359 focused our attention on functional characterization of one of each of the PL fimbriae  
360 belonging to these classes. It was also interesting to identify some variant alleles of the PlfG  
361 adhesin in other *E. coli* strains as well as a subgroup that was identified in some strains of  
362 *Cronobacter sakazakii* and other *Cronobacter* spp. (Fig 4). Although *Cronobacter* strains  
363 containing the *plf* fimbrial clusters were sampled from spices, *Cronobacter sakazaki* and  
364 related *Cronobacter* spp. are important foodborne pathogens that can contaminate dehydrated  
365 milk and other products and cause serious extraintestinal infections, particularly in neonates  
366 (Healy *et al.*, 2010, Lee *et al.*, 2019).

367 The capacity of PL fimbriae to form biofilms at different temperatures was also  
368 investigated, and both the class I and class II PL fimbriae promoted biofilm formation with  
369 PlfG class I producing more biofilm at 25°C and 37°C, but not 42°C. By contrast, the PlfG  
370 class II adhesin produced very high levels of biofilm at all temperatures tested. Presence of



371 the PlfG adhesin was important for high-level biofilm production for PlfG class II, since the  
372 absence of the *plfG* adhesin gene greatly reduced biofilm formation. Notably, after growth at  
373 37°C, the level of biofilm produced by the  $\Delta$ *plfG* clone was significantly higher than the  
374 empty vector and comparable to levels of biofilm produced by Pap reference clones and the  
375 PlfG class I clone. This suggests that other factors in addition to the G adhesin may also  
376 contribute to increased biofilm formation associated with expression of *plf* or *pap* fimbrial  
377 genes.

378         Since both types of PL fimbriae conveyed increased adherence to human epithelial  
379 bladder and kidney cells (Fig. 8), we investigated the potential of these fimbriae to contribute  
380 to urinary tract colonization in a murine model. Deletion of the *plf* genes from either *E. coli*  
381 strain QT598 or strain UMEA-3703-1 did not have an appreciable effect on colonization of  
382 either the bladder or the kidneys. Further, despite being isolated from a human UTI, strain  
383 UMEA-3703-1 was not a strong colonizer in the mouse UTI model.

384         The mouse UTI model may not be as representative of a human infection when using  
385 certain bacterial strain backgrounds or when investigating specific mechanisms of virulence  
386 such as adherence and fimbrial adhesins. P fimbriae have been shown to play a role in urinary  
387 infection, particularly for pyelonephritis in cynomolgous monkeys (Roberts *et al.*, 1994) and  
388 these fimbriae alone can confer an asymptomatic *E. coli* urinary strain the capacity to elicit  
389 strong regulatory modulation in humans by acting as an IRF-7 agonist and reprogramming the  
390 immune response in the urinary tract (Ambite *et al.*, 2019). In the case of the murine model, it  
391 has been demonstrated that P fimbriae can reduce the immune response in the kidney by  
392 decreased production of polymeric Ig receptor and reduced secretion of IgA (Rice *et al.*,  
393 2005). However, the role of P fimbriae in bacterial colonization in the UTI mouse model has  
394 been less evident. Initially, *pap* genes cloned into avirulent *E. coli* K-12 or an intestinal  
395 commensal *E. coli* were shown to increase colonization of the mouse kidney (Hagberg *et al.*,

396 1983, O'Hanley *et al.*, 1985). By contrast, deletion of *pap* from different UPEC strains did not  
397 alter colonization of the urinary tract in CBA/J mice (Mobley *et al.*, 1993). Reasons why PL  
398 fimbriae as much as P fimbriae may not play a critical role in the mouse UTI model may be  
399 due to differences in lectin-receptor target specificity present on murine cells and/or the  
400 potential redundancy of adherence mechanisms due to production of multiple fimbrial  
401 adhesins in UPEC strains. Despite not playing a role in the UTI murine infection model,  
402 expression of the *plf* was upregulated more than 40-fold in the bladder and was increased by  
403 5-fold in minimal medium compared to rich medium (Fig. 10.B). This indicates that the  
404 expression of these fimbriae can be increased by cues during infection, which may include  
405 host factors or decreased nutrient availability. It will be of interest to determine whether PL  
406 fimbriae or specific PlfG adhesins may contribute to infection in other animal models such as  
407 poultry and to further investigate PL fimbriae receptor specificity, potential role in  
408 modulation of host immune response and regulation of production of this newly identified  
409 group of fimbriae.

## 410 **Materials and Methods**

### 411 **Bacterial strains, plasmids, and growth conditions**

412 Bacterial strains and plasmids used in this study are listed in Table 1. ExPEC strain  
413 QT598 (a passaged derivative of strain MT156 (Marc *et al.*, 1996)) is an O1:K1 sequence  
414 type ST1385 strain originally isolated from a turkey suffering from colibacillosis in France  
415 (Habouria *et al.*, 2019). UPEC strain CFT073 was isolated from the blood and urine of a  
416 woman suffering from urinary tract infection (Mobley *et al.*, 1990), and UMEA-3703-1  
417 (NCBI Biosample: SAMN01885978) was isolated from the urine of a human with  
418 bacteremia. *E. coli* K-12 laboratory strains DH5 $\alpha$  and ORN172 (type 1 fimbriae *fim*-negative  
419 strain) were used for cloning and protein expression. Reference clones expressing fimbriae

420 encoding different PapG adhesin classes were used as controls including plasmids pPap5  
421 (*papG<sub>J96</sub>*)-class I (Hull *et al.*, 1981, Lindberg *et al.*, 1984), pDC5 (*papG<sub>IA2</sub>*)-class II (Clegg,  
422 1982), and pJFK102 (*prsG<sub>J96</sub>*)-class III (Karr *et al.*, 1989, Lindstedt *et al.*, 1989).

423 Bacteria were routinely grown at 37°C on solid or liquid Luria–Bertani LB medium  
424 (Alpha Bioscience, Baltimore, MD). When required, antibiotics were added to a final  
425 concentration of 100µg/ml of ampicilin, 30 µg/ml of chloramphenicol, or 50 µg/ml of  
426 kanamycin.

### 427 **Bioinformatics analysis**

428 Identification and comparison of sequences in the databases was achieved by  
429 accessing data on completed genomes and BioProjects publicly available in the NCBI  
430 database ([www.ncbi.nlm.nih.gov](http://www.ncbi.nlm.nih.gov)). Analyses included BLAST against both nucleotide and  
431 protein entries. Figures presenting the organization and comparison of genes and gene clusters  
432 were generated from the nucleotide accession numbers and entries using SnapGene (Version  
433 5.2.1) ([www.snapgene.com](http://www.snapgene.com)). For comparison of the protein sequences, entries were obtained  
434 either from NCBI or the Universal Protein Resource (UniProt) ([www.uniprot.org](http://www.uniprot.org)) websites.  
435 Phylogenetic analyses of protein sequences were done using the platform at Phylogeny.fr  
436 (<http://www.phylogeny.fr>) using the default (“one click”) parameters (Dereeper *et al.*, 2008).  
437 Analyses consisted of Multiple sequence alignment with MUSCLE (Edgar, 2004), alignment  
438 curation with GBlocks (Castresana, 2000), maximum-likelihood phylogeny analysis using  
439 PhyML 3.0 (Guindon *et al.*, 2010), and TreeDyn for generation and editing of trees  
440 ([www.treedyn.org](http://www.treedyn.org)). Specific parameters are described at the Phylogeny.fr website platform.

### 441 **Construction of plasmids**

442 Cloning of the *plf* gene clusters and *plfG* and *papG* genes encoding the different  
443 classes of adhesins were obtained by PCR amplification using specific primers (Table 2) and

444 Q5 High Fidelity-DNA polymerase (New England Biolabs [NEB]). The A-Tailing Kit (NEB)  
445 was then used to add additional deoxyadenosine (A) to the 3' end of the PCR products. The  
446 insert possessing the additional A at 3' end was ligated to the linearized vector with additional  
447 deoxythymidine (T) residues using T4 DNALigase (NEB). The *plf* gene cluster from strain  
448 QT598 (*plf*<sub>QT598</sub>) was amplified using primers CMD1847\_F and CMD1900\_R and cloned into  
449 vector pUCm-T (Bio Basic, Markham, Ontario, Canada), generating plasmid pIJ507. This  
450 plasmid encodes the full *plf* gene cluster with a PlfG class II adhesin. The *plf* gene cluster  
451 from strain UMEA-3703-1 (*plf*<sub>UMEA</sub>) was amplified using primers CMD2119\_F and  
452 CMD2120\_R and cloned into vector pBC sk+, generating plasmid pIJ523. This plasmid  
453 encodes the full *plf*<sub>UMEA</sub> gene cluster with a PlfG class I adhesin. To generate chimeric gene  
454 clusters comprised of *plf*<sub>QT598</sub> with different types of G adhesin encoding genes, pIJ507 was  
455 used as a template. *plfG*<sub>QT598</sub> was deleted using an inverse PCR method with primers  
456 CMD2168\_F and CMD2169\_R which introduced PmeI sites and amplified a linear fragment  
457 lacking the *plfG*<sub>QT598</sub> gene. The linearized product was then treated with DpnI endonuclease  
458 (NEB) to cleave any methylated template sequence. The linear fragment was either ligated  
459 using T4 DNA ligase (NEB) to generate pIJ598, which encodes *plfBAHCDJKEF*  
460 (*plf*<sub>QT598</sub> $\Delta$ *plfG*), or used as a template to generate chimeric fimbrial gene clusters containing  
461 different G adhesins using the T4 DNA ligase (NEB). PCR fragments containing G adhesin  
462 genes were obtained using primer pairs CMD2171\_F and CMD2172\_R (for *papG* class I  
463 from strain J96); CMD2174\_F and CMD2175\_R (for *papG* class II from strain CFT073);  
464 CMD2177\_F and CMD2178\_R (for *prsG* [*papG* class III] from strain J96); and CMD2180\_F  
465 and CMD2181\_R (for *plfG*<sub>UMEA-3703-1</sub> *plfG* class I from strain UMEA-3703-1). Cloning  
466 experiments to generate recombinant plasmids or subclones were first achieved using *E. coli*  
467 strain DH5 $\alpha$ . The plasmids were extracted using a Miniprep kit according to the  
468 manufacturer's recommendations (Bio Basic Inc.) and then transformed into *E. coli fim-*

469 negative strain ORN172 for phenotypic testing. Strains containing reference plasmids that  
470 contain full P fimbrial gene clusters were used as reference controls: pPap5 (encoding P  
471 fimbriae PapG class I from *E. coli* J96) (Hull *et al.*, 1981, Lindberg *et al.*, 1984), pDC5  
472 (encoding P fimbriae PapG class II from strain IA2) (Clegg, 1982), and pJFK102 (encoding  
473 Prs fimbriae PrsG (PapG class III) from *E. coli* J96) (Karr *et al.*, 1989, Lindstedt *et al.*, 1989).

#### 474 **Deletion of the *plf* genes from strains QT598 and UMEA-3703-1**

475 A *plf* knockout mutant of APEC strain QT598 was obtained by the lamda red  
476 recombinase method (Datsenko *et al.*, 2000). First, plasmid pKD46 expressing lambda red  
477 recombinase was transformed into QT598 by electroporation, then; the kanamycin resistance  
478 cassette was amplified from plasmid pKD4 by PCR with primers CMD2112\_F and  
479 CMD2113\_R and transformed into QT598 carrying plasmid pKD46 by electroporation.  
480 Mutants were selected at 37°C and then the loss of genes was confirmed by PCR using  
481 screening primers CMD1849\_F and CMD1900\_R, to obtain the QT598 $\Delta$ *plf* strain (QT4420).  
482 The same method was used to create the  $\Delta$ *plf* deletion mutation in UMEA-3703-1 using  
483 primers CMD2112\_F and CMD2114\_R, to generate strain QT4598 (UMEA-3703-1  $\Delta$ *plf*).  
484 The deletion was confirmed using primers CMD2115\_F and CMD2116\_R.

#### 485 **Extraction of fimbriae and Western blotting analysis**

486 Fimbriae were extracted using the heat extraction method as described previously by  
487 (LyMBERopoulos *et al.*, 2006), with some modifications. Briefly, overnight cultures were  
488 incubated at 56°C for 1h and harvested by centrifugation at 4000 rpm for 15 min.  
489 Supernatants were incubated in 10% trichloroacetic acid (TCA) to precipitate proteins.  
490 Proteins were then concentrated by centrifugation at 12000 rpm for 20 min, washed twice  
491 with Tris-EDTA (0.05 M) pH 12 and pH 8.5 and resuspended in 0.1 mL of Tris-EDTA  
492 (0.05M) pH 8.5. Western blotting was performed as previously described (Crépin *et al.*, 2008)

493 with some modifications. Proteins were separated using 15% polyacrylamide gel, transferred  
494 onto a nitrocellulose membrane (Bio-Rad Laboratories, CA, USA), blocked with 15 ml of  
495 blocking buffer TBS-T (0,15 M NaCl; 0,025M Tris; 0,05% Tween ; 3% skim milk) for 1h at  
496 4°C. Fimbrial major subunit protein was detected using rabbit polyclonal antibodies provided  
497 by New England Peptide (1:1000) against a peptide corresponding to part of the PlfA major  
498 fimbrial subunit (Ac-CAHLAADGISVKKD-amide) for 45 min at room temperature. The  
499 membrane was then washed 3 times with washing buffer (0,15 M NaCl; 0,025M Tris; 0,05%  
500 Tween) and incubated with an anti-rabbit conjugated secondary antibody (1:20000) for 45  
501 min at room temperature. After four washes with TBS-T, proteins were detected using  
502 SuperSignal West Pico chemiluminescent substrate (Pierce) according to the manufacturer's  
503 instructions.

#### 504 **Transmission electron microscopy (TEM)**

505 Bacteria for electron microscopy were grown overnight at 37°C. Cultures were then  
506 adsorbed onto a glow-discharged Formvar-coated copper grid for 1 minute and stained with  
507 1% phosphotungstic acid. The excess of liquid was removed with a filter paper. Samples were  
508 then dried and observed under a Hitachi H700 transmission electron microscope.

#### 509 **Hemagglutination assay (HA)**

510 Hemagglutination was performed in 96-well round-bottom plates as described in  
511 (Provence *et al.*, 1994). Briefly, different types of blood were tested for this assay, human (A  
512 and O), horse, bovine, sheep, pig, rabbit, chicken, turkey, and dog red blood cells (RBCs)  
513 were suspended in PBS at a final concentration of 3% and added to 96-well plates. Clones  
514 expressing different classes of PapG were grown in LB broth at 37°C, centrifuged at 3000  $xg$   
515 for 15 min, and pellets were suspended in phosphate-buffered saline (PBS, pH 7.4) and

516 adjusted to an optical density (OD<sub>600</sub>) of 60. The agglutinating titer was determined as the  
517 most diluted well with agglutination after 30 min of incubation on ice.

### 518 **Biofilm assays**

519 Biofilm formation in 96-well microtiter plates was performed as previously described  
520 (Genevaux *et al.*, 1996). Fimbrial clones were grown statically in LB at 25°C, 30°C, 37°C and  
521 42°C for 48 hours. After 48h of incubation, the liquid was discarded and plates were washed  
522 and stained with 0.1% crystal violet (Sigma) for 15 min. Ethanol-acetone solution (80:20) was  
523 used to dissolve biofilm and the optical density was measured at 595 nm to determine the  
524 production of biofilm.

### 525 **Bacterial adherence to epithelial cell lines.**

526 Human bladder 5637 (ATCC HTB-9) and kidney HEK293 (ATCC® CRL-1573™)  
527 epithelial cell lines were grown to confluence in 24-well plates in RPMI 1640 or EMEM  
528 (Wisent Bio Products, St-Bruno, Canada) supplemented with 10% fetal bovine serum (FBS)  
529 at 37°C in 5% CO<sub>2</sub>. Fimbrial clones expressing different classes of PapG or PlfG adhesins  
530 were grown in LB medium at 37°C, cultures were then centrifuged, resuspended in RPMI  
531 1640 or EMEM with 10% FBS and added to cells at a multiplicity of infection (MOI) of 10  
532 for 2 h, as described (Matter *et al.*, 2011). After 2 h, cells were washed three times with PBS,  
533 lysed with 1% Triton X-100, diluted, and plated onto LB agar plates supplemented with  
534 selective antibiotics.

### 535 **Murine Urinary tract infection model.**

536 To determine the potential role of PL fimbriae in virulence, wild type strains QT598  
537 and UMEA-3703-1 as well as the QT598 $\Delta$ *plf* (QT4420) and UMEA-3703-1 $\Delta$ *plf* (QT4598)  
538 were tested in 6-week-old CBA/J female mice using an ascending UTI model adapted from  
539 (Hagberg *et al.*, 1983). A total of 5 mice in each group were infected with 10<sup>9</sup> CFU/ml of

540 bacteria. After 48h, the infected mice were euthanized and bladders and kidneys were  
541 harvested aseptically for the bacterial count on MacConkey agar plates. To study the  
542 expression of *plf* *in vivo*, bladder samples after necropsy were homogenized with TRIzol® LS  
543 reagent (Thermo Fisher Scientific) for RNA extractions.

#### 544 **qRT-PCR to measure PL fimbrial gene expression levels.**

545 We compared the expression of PL fimbriae by comparing RNA levels of the *plfA*  
546 gene in different conditions: LB medium, minimal M63 medium, and during infection in  
547 bladders of mice. For *in vitro* analysis, total RNAs from bacterial samples were extracted  
548 according to the manufacturer's protocol EZ-10 Spin Column Total RNA Miniprep Kit  
549 (BioBasic). For *in vivo* analysis, bladder samples were homogenized with TRIzol® LS reagent  
550 (Thermo Fisher Scientific), incubated with chloroform followed by centrifugation and  
551 incubation in ethanol (95-100%) to separate the aqueous phase that contains RNA. Then,  
552 RNA samples were extracted using Direct-zol RNA Miniprep kit (Zymo Research, Irvine,  
553 CA, USA) according to the manufacturer's recommendations. All RNA samples were treated  
554 with TURBO Dnase (Ambion), to eliminate any DNA contamination. The Iscript™ Reverse  
555 transcription supermix (Bio-Rad Life Science, Mississauga, ON, Canada) was used to  
556 synthesize cDNAs from samples according to the manufacturer's protocol. Primers were  
557 specific to the *plfA* gene and the RNA polymerase sigma factor *rpoD* (house-keeping control).  
558 qRT-PCR was performed in the Corbett Rotorgene (Thermo Fisher) instrument using 50 ng of  
559 cDNA, 100 nM of each primer and 10µl of SsoFast Evagreen supermix (Bio-rad). Data were  
560 analyzed using the  $2^{-\Delta\Delta CT}$  (Livak *et al.*, 2001).

#### 561 **Statistical analyses**

562 All data were analyzed with the Graph Pad Prism 6 software (GraphPad Software, San  
563 Diego, CA, USA). A Mann-Whitney test was used for mouse infection experiments to



564 determine statistical significance. Analysis of variance (ANOVA) was used to compare the  
565 means of samples. Differences between groups were considered significant for P values of p  
566 <0.05.

### 567 **Ethics statement**

568 Protocols for mice urinary tract infection was approved by the animal ethics  
569 evaluation committee – *Comité Institutionnel de Protection des Animaux* (CIPA No 1608–02)  
570 of the INRS-Centre Armand-Frappier Santé Biotechnologie.

### 571 **Acknowledgments**

572 We thank Prof. James Johnson for providing reference clones carrying different  
573 classes of Pap and related fimbrial adhesins and Prof. Niels Frimodt-Møller for providing  
574 UPEC strain UMEA-3703-1. We thank Micheline Letarte and Arnaldo Nakamura for  
575 assistance with electron microscopy. Funding for this work was supported by Natural  
576 Sciences and Engineering Research Council (NSERC) Canada Discovery Grant 2019-06642.

577

578 **Figure Legends:**

579 **Fig. 1. The P-like fimbrial (*plf*) gene cluster of plasmid pEC-598-1 is located**  
580 **adjacent to the REPFIB region.** Comparison of the cargo genes adjacent to the REPIB  
581 region on F- and related conjugative plasmids. In other ColV-like plasmids, such as pAPEC-1  
582 or pVM1, the cargo region encodes *mig-14*, *hlyF*, and *ompT* virulence genes. In pO157 from  
583 *E. coli* O157:H7 strains, the genes encoding the Ehx hemolysin RTX-toxin are within the  
584 cargo region. The F-plasmid cargo gene region also encodes virulence-associated genes, a  
585 protease, OmpP, that can degrade host defense peptides and genes encoding self-associating  
586 AIDA-1 like autotransporters, YchA and YchB. NCBI Accession numbers: pEC598  
587 (NZ\_KP119165.1), “pColV-like”: pAPEC-1 (CP000836), pVM01 (NC\_010409.1), pO157  
588 (AB011549), F plasmid (NC\_002483.1).

589 **Fig. 2. Phylogenetic relationship of PL fimbriae (Plf) with other types of fimbriae.**  
590 **A.** Phylogram using sequences of fimbrial usher proteins (FUPs) belonging to the  $\pi$  fimbriae  
591 clade based on the classification scheme of (Nuccio *et al.*, 2007). The PlfC protein, shown in  
592 blue, clusters with other FUPs, Sfp and Pix, more closely related to P fimbriae. **B.** Alignment  
593 of segment S1 of the major subunit proteins also places PlfA within the PapA-like subfamily  
594 (Ic) according to the scheme of Girardeau *et al.* (Girardeau *et al.*, 2000). The alignment results  
595 in a consensus (**GxGxVxFxG[TS][VI][IV] DAP**) motif. Sequences used for **(A)** were UniProt  
596 (uniprot.org): **1**-P53514, **2**-Q93MT4, **3**-Q51904, **4**-H9L4A4, **5**-P77196, **6**-A0A3U8KZY6, **7**-  
597 Genbank-NCBI: AKG46878.1, **8**- A0A454A7L3, **9**- B8RHG0, **10**- P07110. Sequences used  
598 for **(B)** were **PlfA**-Genbank-NCBI: AKG46876.1; UniProt (uniprot.org) **PapA (F13)**-  
599 X61239, **PapA (F11)**-Q4FBG1, **PapA (F9)**-M68059, **PixA**-A0A454A7E1, **SfpA**- W6JHT1,  
600 **MrpA**- Q03011, **SmfA**-P13421.

601 **Fig. 3. Genetic organization of the strain QT598 PL fimbrial (*plf*) gene cluster**

602 **and comparison to related fimbrial gene clusters.** The genes are labelled based on the *pap*-  
603 gene cluster convention. The numbers below each gene are the percentage amino acid  
604 identity/similarity obtained using BLASTP (<https://blast.ncbi.nlm.nih.gov/>). DNA sequences  
605 used were *plf* from strain QT598 (Genbank KP119165.1, bases 5500-14700); *pap* from UPEC  
606 536 (Hochhut *et al.*, 2006) (Genbank CP000247.1, region ECP\_4533 to ECP\_4543); *pix* from  
607 UPEC X2194 (Lugering *et al.*, 2003) (Genbank AJ307043); *sfp* from pSFO157 (Brunner *et*  
608 *al.*, 2001) (AF401292.1, bases 10000-17000). \*SfpF was converted to a longer 186 amino  
609 acid open reading frame based on the Genbank submission. Predicted functions of gene  
610 products are indicated above. Colors denote paralogs from each fimbrial gene cluster. The *sfp*  
611 and *pix* clusters lack genes encoding PapK and PapE paralogs, that encode an adaptor  
612 controlling fibrillum length (Jacob-Dubuisson *et al.*, 1993) and minor fibrillum subunits  
613 (Kuehn *et al.*, 1992) respectively in P fimbriae.

614 **Fig. 4. Phylogenetic analysis of different PlfG adhesin proteins.** Predicted PlfG  
615 proteins from individual isolates were obtained from the sequence database at NCBI  
616 (<https://www.ncbi.nlm.nih.gov>) and one individual isolate sequence was selected based on  
617 sequence diversity and association with a complete *plf* fimbrial gene cluster. The total number  
618 of protein accessions for each group (No. of entries), at time of submission, are listed on the  
619 left in red. Multiple alignment (Muscle), and phylogeny (PhyML) were generated using  
620 Phylogeny.fr ([www.phylogeny.fr](http://www.phylogeny.fr)). Analysis determined 5 distinct clades of PlfG adhesins.  
621 Including a group (class V) specific to some *Citrobacter* spp. (indicated in green). The PapG  
622 reference adhesins from P fimbriae clustered together as a distinct group from all of the PlfG  
623 adhesin proteins. The *plf* gene clusters from two strains: UMEA-3703-1 (PlfG class I) and  
624 QT598 (PlfG class II), both circled in red, were cloned for further analysis. The total number  
625 of protein accessions for each group, at time of submission, are listed on the right. Twenty-  
626 one different non-redundant entries were used: 1-WP\_059331527.1; 2- WP\_137488293.1; 3-

627 WP\_097732425.1; 4- WP\_033555940.1; 5-WP\_201475228.1; 6-EGW8442016.1; 7-  
628 MBB8123006.1; 8-WP\_029305610.1; 9-WP\_112039355.1; 10- WP\_096965282.1 11-  
629 WP\_137504062.1; 12- WP\_176323703.1; 13-EFO1491433.1; 14- WP\_133116004.1 15-  
630 WP\_158696804.1; 16- WP\_158685756.1; 17-WP\_105536056.1; 18 WP\_001523394.1; 19-  
631 EFB9349400.1; 20-WP\_016233112.1; 21- WP\_033549358.1. Alignment also included  
632 reference entries for the 4 established PapG alleles: PapG-I (strain J96)-CAA43570.1; PapG-  
633 II (strain IA2) - AAA24293.1; PapG-III (strain J96)-P42188; class PapG class IV  
634 (AAK08949.1) strain BF31.

635 **Fig. 5. PL fimbriae visualized by transmission electron microscopy.** A) ORN172  
636 with empty vector showing no fimbriae, Bar=500 nm. B) ORN172 with plasmid pIJ507  
637 containing *plf*<sub>QT598</sub> Bar=100 nm. C) ORN172 with plasmid pIJ507 containing *plf*<sub>UMEA3703-1</sub>,  
638 Bar=500 nm.

639 **Fig. 6: Hemagglutination activity of different clones expressing P or PL-fimbriae.**  
640 Clones were *E. coli* afimbriated *fim*-negative strain ORN172 expressing P or PL- fimbriae.  
641 Cells were adjusted to an O.D.<sub>600nm</sub> of 60 and then diluted 2-fold in 96-well plates containing  
642 a final concentration of 3 % erythrocytes from different species. Titers are the average  
643 maximal dilution showing agglutination. Both human A and O blood gave similar titers.  
644 Reference clones showed different hemagglutination activity. However,  $\Delta plfG$  clone as well  
645 as the empty vector showed no hemagglutination activity of any of the erythrocytes tested.  
646 (\* $p < 0.05$ , \*\* $p < 0.01$ , \*\*\* $p < 0.001$  vs empty vector by one-way ANOVA). Plasmids used were  
647 pPap5 (*papGI*), pDC5 (*papGII*), pJFK102 (*prsG*), pIJ523 (*plf*<sub>UMEA-3703-1</sub>- *plf* class I), pIJ507  
648 (*plf*<sub>QT598</sub>- *plf* class II), pIJ598 (*plf*<sub>QT598</sub> $\Delta plfG$ ).

649 **Fig. 7. Cloning and expression of PL and Pap chimeric fimbriae.** A. Chimeric  
650 clones expressing different classes of PapG/PlfG were visualized by electron microscopy. The

651 Plf class II clone was used as a template to generate chimeric clones. **B.** Western Blot analysis  
652 of heated surface protein extracts from *plf* and chimeric clones. Antibodies used were  
653 polyclonal rabbit antibodies raised against a peptide corresponding to the fimbrial major  
654 subunit protein PlfA.

655 **Fig. 8. Reference and chimeric clones promote adherence to human kidney**  
656 **(HEK-293) and bladder (5637) epithelial cells.** Cell monolayers were infected with *E. coli*  
657 *fim*-negative ORN172 expressing P and PL fimbrial proteins at a multiplicity of infection  
658 (MOI) of 10 and incubated at 37°C at 5% CO<sub>2</sub> for 2 hours. Adherent bacteria were  
659 enumerated by plating on LB agar. Empty vector was used as a negative-control and APEC  
660 MT78 as a positive control for adherence to cell lines. All the clones encoding P or PL  
661 fimbrial adhesins (reference and chimeric clones) demonstrated increased adherence to human  
662 bladder 5637 and kidney HEK-293 epithelial cell lines compared to the strain containing the  
663 empty vector. The  $\Delta plfG$  clone also did not adhere to human epithelial cells. Data are the  
664 averages of three independent experiments. Error bars represent standard errors of the means  
665 (\* $p < 0.05$ , \*\* $p < 0.01$ , \*\*\* $p < 0.001$  vs empty vector by one-way ANOVA).

666 **Fig. 9. Biofilm production by clones expressing Plf<sub>QT598</sub> and Plf<sub>UMEA-3703-1</sub> and**  
667 **reference and chimeric clones at different temperatures.** Clones of *E. coli* strain ORN172  
668 expressing P and P-like fimbriae proteins were grown at different temperatures (25, 37 and  
669 42°C) in polystyrene plate wells for 48 hours and then stained with crystal violet. Remaining  
670 crystal violet after washing with acetone was measured as absorbance at 595nm. Data are the  
671 means of three independent experiments and error bars represent standard errors of the means  
672 (\* $p < 0.05$ , \*\* $p < 0.01$ , \*\*\* $p < 0.001$  compared to empty vector using one-way ANOVA). Empty  
673 vector was used as a negative-control and *S. liquefaciens* strain was used as a positive control  
674 for biofilm production.

675 **Fig. 10. Loss of PL fimbriae in the murine model of ascending UTI does not**  
676 **reduce colonization.** CBA/J mice were infected with either the WT strain QT598 or an  
677 isogenic  $\Delta plf$  mutant ( $\Delta plf$ ). Mice were euthanized after 48h, and bladder and kidneys were  
678 harvested for colony counts. **A.** Infections were performed to compare wild-type strain QT598  
679 to its mutant. There were no significant differences in colony counts in either bladders or  
680 kidneys (Data are means +/- standard errors of the means. \*  $p < 0.05$ , \*\*  $p < 0.01$ , Mann-  
681 Whitney Test). **B.** RT-PCR analysis of *plf* expression by strain QT598. QT598 was grown in  
682 LB medium to OD<sub>600</sub> of 0.6 and used as a standard to compare it with growth in M63 minimal  
683 medium (with glycerol as carbon) at different growth phases (OD<sub>600</sub> of 0.3, 0.6. and 0.9).  
684 RNAs were also extracted from infected bladders. Transcription of *plf* was significantly  
685 upregulated in the mouse bladder. (\* $p < 0.05$ , \*\*\* $p < 0.001$ , error bars indicate standard  
686 deviations, Student t-test). The dashed line corresponds to the cutoff for a significant  
687 difference in expression.

688 **Table 1. Plasmids and Strains used in this study**

| Plasmids | Characteristic(s)                                     | References                                                     |
|----------|-------------------------------------------------------|----------------------------------------------------------------|
| pKD4     | Plasmid used for amplification of <i>kan</i> cassette | (Datsenko <i>et al.</i> , 2000)                                |
| pKD13    | Plasmid used for amplification of <i>kan</i> cassette | (Datsenko <i>et al.</i> , 2000)                                |
| pKD46    | $\lambda$ Red plasmid; Amp <sup>r</sup>               | (Datsenko <i>et al.</i> , 2000)                                |
| pUCmT    | Cloning vector; Amp <sup>r</sup>                      | Bio Basic Inc.                                                 |
| pBC sk+  | Cloning vector; Cm <sup>r</sup>                       | Stratagene, La Jolla, CA                                       |
| pPap5    | Pap fimbriae expressing PapGI from J96                | (Hull <i>et al.</i> , 1981,<br>Lindberg <i>et al.</i> , 1984)  |
| pDC5     | Pap fimbriae expressing PapGII from IA2               | (Clegg, 1982)                                                  |
| pJFK102  | Pap fimbriae expressing PrsG from J96                 | (Karr <i>et al.</i> , 1989,<br>Lindstedt <i>et al.</i> , 1989) |
| pIJ507   | pUCmT:: <i>plf</i> <sub>QT598</sub>                   | This study                                                     |
| pIJ523   | pBC sk+:: <i>plf</i> <sub>UMEA-3703-01</sub>          | This study                                                     |

|                         |                                                                                                                                                                                            |                                                            |
|-------------------------|--------------------------------------------------------------------------------------------------------------------------------------------------------------------------------------------|------------------------------------------------------------|
| pIJ594                  | pUCmT:: <i>plf</i> <sub>QT598</sub> - <i>papGI</i>                                                                                                                                         | This study                                                 |
| pIJ595                  | pUCmT:: <i>plf</i> <sub>QT598</sub> - <i>papGII</i>                                                                                                                                        | This study                                                 |
| pIJ596                  | pUCmT:: <i>plf</i> <sub>QT598</sub> - <i>prsG</i>                                                                                                                                          | This study                                                 |
| pIJ597                  | pUCmT:: <i>plf</i> <sub>QT598</sub> - <i>plfGI</i>                                                                                                                                         | This study                                                 |
| pIJ598                  | pUCmT:: <i>plf</i> <sub>QT598</sub> - $\Delta$ <i>plfGII</i>                                                                                                                               | This study                                                 |
| <b>Strains</b>          |                                                                                                                                                                                            |                                                            |
| ORN172                  | <i>fim</i> negative strain<br><i>thr-1 leuB thi-1</i> $\Delta$ ( <i>argF-lac</i> )U169 <i>xyl-7 ara-13 mtl-2 gal-6 rpsL tonA2 supE44</i> $\Delta$ ( <i>fimBEACDFGH</i> ):: <i>Km pilG1</i> | (Woodall <i>et al.</i> , 1993)                             |
| MT78                    | APEC O2:H <sup>+</sup> :K1, ST95                                                                                                                                                           | (Dho <i>et al.</i> , 1982)                                 |
| QT2799                  | <i>Serratia liquefaciens</i>                                                                                                                                                               | ATCC27592                                                  |
| QT598                   | APEC O1:K1, ST1385                                                                                                                                                                         | (Habouria <i>et al.</i> , 2019, Marc <i>et al.</i> , 1996) |
| QT4420                  | QT598 $\Delta$ <i>plf</i> , Km <sup>R</sup>                                                                                                                                                | This study                                                 |
| UMEA-3703-1             | UPEC strain, urine of patient with bacteremia                                                                                                                                              | NCBI Biosample : SAMN01885978                              |
| QT4598                  | UMEA-3703-1 $\Delta$ <i>plf</i> , Km <sup>R</sup>                                                                                                                                          | This study                                                 |
| <b>Reference Clones</b> |                                                                                                                                                                                            |                                                            |
| QT5722                  | ORN172/ pPap5 (reference clone expressing <i>papGI</i> from J96)                                                                                                                           | This study                                                 |
| QT5723                  | ORN172/ pDC5 (reference clone expressing <i>papGII</i> from IA2)                                                                                                                           | This study                                                 |
| QT5724                  | ORN172/ pJFK102 (reference clone expressing <i>prsG</i> from J96)                                                                                                                          | This study                                                 |
| QT4741                  | ORN172/ pIJ523 (reference clone expressing <i>plfGI</i> )                                                                                                                                  | This study                                                 |
| QT5726                  | ORN172/ pIJ507 (reference clone expressing <i>plfGII</i> )                                                                                                                                 | This study                                                 |
| QT5727                  | ORN172/ pIJ598 (reference clone expressing $\Delta$ <i>plfGII</i> )                                                                                                                        | This study                                                 |
| QT5732                  | ORN172/ pUCmT empty vector                                                                                                                                                                 | This study                                                 |
| <b>Chimeric clones</b>  |                                                                                                                                                                                            |                                                            |

|        |                                                           |            |
|--------|-----------------------------------------------------------|------------|
| QT5728 | ORN172/ pIJ594 (chimeric clone expressing <i>papGI</i> )  | This study |
| QT5729 | ORN172/ pIJ595 (chimeric clone expressing <i>papGII</i> ) | This study |
| QT5730 | ORN172/ pIJ596 (chimeric clone expressing <i>prsG</i> )   | This study |
| QT5731 | ORN172/ pIJ597 (chimeric clone expressing <i>plfGI</i> )  | This study |

689

690

**Table 2. Primers used in this study**

| Primers        | Characteristics                            | Sequence                                                            |
|----------------|--------------------------------------------|---------------------------------------------------------------------|
| <b>CMD1847</b> | Plf <sub>QT598_ cloning _F</sub>           | AGCTTAGCGGCCGCATCCGCACAAAC<br>GGTCTTAC                              |
| <b>CMD1900</b> | Plf <sub>QT598_ cloning/screening _R</sub> | ATGAACGGGCCCACCCGACATGAAC<br>ATTCTCC                                |
| <b>CMD2119</b> | Plf <sub>UMEA-3703-01_ cloning _F</sub>    | TCCCCCGGGCTGCAGGAATTCGAGGG<br>AGGGCGTGAATTCTG                       |
| <b>CMD2120</b> | Plf <sub>UMEA-3703-1_ cloning _R</sub>     | GGCGAATTGGGTACCGGGCCCTCTGC<br>AGATGTCACCG                           |
| <b>CMD2171</b> | PapGI <sub>J96_ cloning _F</sub>           | CGATGATGTAAGGTTTATGAAAAAAT<br>GGTCCCCTGCTT                          |
| <b>CMD2172</b> | PapGI <sub>J96_ cloning _R</sub>           | CATAATAAAAATGTTTTTCAGGGGAAA<br>CTCAGAACCA                           |
| <b>CMD2174</b> | PapGII <sub>CFT073_ cloning _F</sub>       | CGATGATGTAAGGTTTATGAAAAAAT<br>GGTCCCAGCTTTG                         |
| <b>CMD2175</b> | PapGII <sub>CFT073_ cloning _R</sub>       | CATAATAAAAATGTTTTTATGGCAAT<br>ATCATGAGCAGC                          |
| <b>CMD2177</b> | PrsG <sub>J96_ cloning _F</sub>            | CGATGATGTAAGGTTTATGAAAAAAT<br>GGCTCCCTGC                            |
| <b>CMD2178</b> | PrsG <sub>J96_ cloning _R</sub>            | CATAATAAAAATGTTTTTATGGCAAT<br>ATCATGAGCAGCG                         |
| <b>CMD2180</b> | PlfGI <sub>UMEA-3703-1 _ cloning _F</sub>  | CGATGATGTAAGGTTTATGAAAAGAG<br>TTATCCTTTTGCTATTG                     |
| <b>CMD2181</b> | PlfGI <sub>UMEA-3703-1 _ cloning _R</sub>  | CATAATAAAAATGTTTTCAATTAATA<br>TCAACCTTTAAACAGCGC                    |
| <b>CMD2168</b> | Delete PlfGII <sub>QT598_KO_F</sub>        | ACGCTAACTCACGTTTAAACATTTTT<br>ATTATGATGTTAAAATATTTGTGTCG<br>CCTTTTG |



|                |                                         |                                                                                |
|----------------|-----------------------------------------|--------------------------------------------------------------------------------|
| <b>CMD2169</b> | Delete PlfGII <sub>QT598</sub> _KO_R    | AAACGTGAGTTAGCGTTTAAACCTTA<br>CATCATCGGATCATAAAAAACGCAC<br>GCGTGAC             |
| <b>CMD2112</b> | Plf <sub>QT598/UMEA-3703-1</sub> _KO_F  | AGTAATAACTGACAGGATATTTTAAC<br>TATAATCAGGAGGTTATTTCCATGGT<br>GTAGGCTGGAGCTGCTTC |
| <b>CMD2113</b> | Plf <sub>QT598</sub> _KO_R              | CCCGACATGAACATTCTCCAGACTAT<br>ATTACAGGAGAATTCACCAGTTCCAT<br>GGGAATTAGCCATGGTCC |
| <b>CMD2114</b> | Plf <sub>UMEA-3703-1</sub> _KO_R        | TGCTACGTGCCATCTCATGCTCTTTAC<br>TTTCTCTTTGGTTAATATCAAATGG<br>GAATTAGCCATGGTCC   |
| <b>CMD1849</b> | Plf <sub>QT598</sub> _screening_F       | AGATGGGATCCACAAACACAAGGTC<br>GCTCAGGG C                                        |
| <b>CMD2115</b> | Plf <sub>UMEA-3703-1</sub> _screening_F | ATGTCCGTTGAGCACTTTTCG                                                          |
| <b>CMD2116</b> | Plf <sub>UMEA-3703-1</sub> _screening_R | TGAAATCACCCCTATGCACA                                                           |
| <b>CMD2186</b> | qPCR PlfA_F                             | CGGATCAGGGACAAGGTAAAG                                                          |
| <b>CMD2187</b> | qPCR PlfA_R                             | CAGCCAGATGAGCTTTGG                                                             |

691

## 692 **References**

- 693 Ambite I, Butler DSC, Stork C, Gronberg-Hernandez J, Koves B, Zdziarski J, Pinkner J,  
694 Hultgren SJ, Dobrindt U, Wullt B & Svanborg C (2019) Fimbriae reprogram host  
695 gene expression - Divergent effects of P and type 1 fimbriae. *PLoS Pathog*  
696 15(6):e1007671.
- 697 Bielaszewska M, Prager R, Vandivinit L, Musken A, Mellmann A, Holt NJ, Tarr PI, Karch H  
698 & Zhang W (2009) Detection and characterization of the fimbrial *sfp* cluster in  
699 enterohemorrhagic *Escherichia coli* O165:H25/NM isolates from humans and cattle.  
700 *Appl Environ Microbiol* 75(1):64-71.
- 701 Blum G, Falbo V, Caprioli A & Hacker J (1995) Gene clusters encoding the cytotoxic  
702 necrotizing factor type 1, Prs-fimbriae and alpha-hemolysin form the pathogenicity  
703 island II of the uropathogenic *Escherichia coli* strain J96. *FEMS Microbiol Lett*  
704 126(2):189-195.

- 705 Brunder W, Khan AS, Hacker J & Karch H (2001) Novel type of fimbriae encoded by the  
706 large plasmid of sorbitol-fermenting enterohemorrhagic *Escherichia coli* O157:H(-).  
707 *Infect Immun* 69(7):4447-4457.
- 708 Castresana J (2000) Selection of conserved blocks from multiple alignments for their use in  
709 phylogenetic analysis. *Mol Biol Evol* 17(4):540-552.
- 710 Clegg S (1982) Cloning of genes determining the production of mannose-resistant fimbriae in  
711 a uropathogenic strain of *Escherichia coli* belonging to serogroup O6. *Infect Immun*  
712 38(2):739-744.
- 713 Connell I, Agace W, Klemm P, Schembri M, Marild S & Svanborg C (1996) Type 1 fimbrial  
714 expression enhances *Escherichia coli* virulence for the urinary tract. *Proc Natl Acad*  
715 *Sci U S A* 93(18):9827-9832.
- 716 Crépin S, Lamarche MG, Garneau P, Séguin J, Proulx J, Dozois CM & Harel J (2008)  
717 Genome-wide transcriptional response of an avian pathogenic *Escherichia coli*  
718 (APEC) pst mutant. *BMC genomics* 9(1):1-17.
- 719 Datsenko KA & Wanner BL (2000) One-step inactivation of chromosomal genes in  
720 *Escherichia coli* K-12 using PCR products. *Proc Natl Acad Sci U S A* 97(12):6640-  
721 6645.
- 722 Dereeper A, Guignon V, Blanc G, Audic S, Buffet S, Chevenet F, Dufayard JF, Guindon S,  
723 Lefort V, Lescot M, Claverie JM & Gascuel O (2008) Phylogeny.fr: robust  
724 phylogenetic analysis for the non-specialist. *Nucleic Acids Res* 36(Web Server  
725 issue):W465-469.
- 726 Dezfulian H, Batisson I, Fairbrother JM, Lau PC, Nassar A, Szatmari G & Harel J (2003)  
727 Presence and characterization of extraintestinal pathogenic *Escherichia coli* virulence  
728 genes in F165-positive E. coli strains isolated from diseased calves and pigs. *J Clin*  
729 *Microbiol* 41(4):1375-1385.
- 730 Dho M & Lafont JP (1982) *Escherichia coli* colonization of the trachea in poultry:  
731 comparison of virulent and avirulent strains in gnotoxenic chickens. *Avian Dis*  
732 26(4):787-797.
- 733 Dozois CM, Pourbakhsh SA & Fairbrother JM (1995) Expression of P and type 1 (F1)  
734 fimbriae in pathogenic *Escherichia coli* from poultry. *Vet Microbiol* 45(4):297-309.
- 735 Edgar RC (2004) MUSCLE: multiple sequence alignment with high accuracy and high  
736 throughput. *Nucleic Acids Res* 32(5):1792-1797.

- 737 Genevaux P, Muller S & Bauda P (1996) A rapid screening procedure to identify mini-Tn10  
738 insertion mutants of *Escherichia coli* K-12 with altered adhesion properties. *FEMS*  
739 *microbiology letters* 142(1):27-30.
- 740 Girardeau JP, Bertin Y & Callebaut I (2000) Conserved structural features in class I major  
741 fimbrial subunits (Pilin) in gram-negative bacteria. Molecular basis of classification in  
742 seven subfamilies and identification of intrasubfamily sequence signature motifs  
743 which might be implicated in quaternary structure. *J Mol Evol* 50(5):424-442.
- 744 Guindon S, Dufayard JF, Lefort V, Anisimova M, Hordijk W & Gascuel O (2010) New  
745 algorithms and methods to estimate maximum-likelihood phylogenies: assessing the  
746 performance of PhyML 3.0. *Syst Biol* 59(3):307-321.
- 747 Gunther NWt, Snyder JA, Lockatell V, Blomfield I, Johnson DE & Mobley HL (2002)  
748 Assessment of virulence of uropathogenic *Escherichia coli* type 1 fimbrial mutants in  
749 which the invertible element is phase-locked on or off. *Infect Immun* 70(7):3344-3354.
- 750 Guyer DM, Kao JS & Mobley HL (1998) Genomic analysis of a pathogenicity island in  
751 uropathogenic *Escherichia coli* CFT073: distribution of homologous sequences among  
752 isolates from patients with pyelonephritis, cystitis, and Catheter-associated bacteriuria  
753 and from fecal samples. *Infect Immun* 66(9):4411-4417.
- 754 Habouria H, Pokharel P, Maris S, Garenaux A, Bessaiah H, Houle S, Veyrier FJ, Guyomard-  
755 Rabenirina S, Talarmin A & Dozois CM (2019) Three new serine-protease  
756 autotransporters of Enterobacteriaceae (SPATEs) from extra-intestinal pathogenic  
757 *Escherichia coli* and combined role of SPATEs for cytotoxicity and colonization of  
758 the mouse kidney. *Virulence* 10(1):568-587.
- 759 Hagberg L, Hull R, Hull S, Falkow S, Freter R & Svanborg Eden C (1983) Contribution of  
760 adhesion to bacterial persistence in the mouse urinary tract. *Infect Immun* 40(1):265-  
761 272.
- 762 Healy B, Cooney S, O'Brien S, Iversen C, Whyte P, Nally J, Callanan JJ & Fanning S (2010)  
763 *Cronobacter* (*Enterobacter sakazakii*): an opportunistic foodborne pathogen.  
764 *Foodborne Pathog Dis* 7(4):339-350.
- 765 Hochhut B, Wilde C, Balling G, Middendorf B, Dobrindt U, Brzuszkiewicz E, Gottschalk G,  
766 Carniel E & Hacker J (2006) Role of pathogenicity island-associated integrases in the  
767 genome plasticity of uropathogenic *Escherichia coli* strain 536. *Mol Microbiol*  
768 61(3):584-595.
- 769 Holden NJ, Uhlin BE & Gally DL (2001) PapB paralogues and their effect on the phase  
770 variation of type 1 fimbriae in *Escherichia coli*. *Mol Microbiol* 42(2):319-330.

- 771 Hull RA, Gill RE, Hsu P, Minshew BH & Falkow S (1981) Construction and expression of  
772 recombinant plasmids encoding type 1 or D-mannose-resistant pili from a urinary tract  
773 infection *Escherichia coli* isolate. *Infect Immun* 33(3):933-938.
- 774 Jacob-Dubuisson F, Heuser J, Dodson K, Normark S & Hultgren S (1993) Initiation of  
775 assembly and association of the structural elements of a bacterial pilus depend on two  
776 specialized tip proteins. *EMBO J* 12(3):837-847.
- 777 Johnson JR, Stell AL, Scheutz F, O'Bryan TT, Russo TA, Carlino UB, Fasching C, Kavle J,  
778 Van Dijk L & Gaastra W (2000) Analysis of the F antigen-specific papA alleles of  
779 extraintestinal pathogenic *Escherichia coli* using a novel multiplex PCR-based assay.  
780 *Infect Immun* 68(3):1587-1599.
- 781 Kariyawasam S, Johnson TJ & Nolan LK (2006) The *pap* operon of avian pathogenic  
782 *Escherichia coli* strain O1:K1 is located on a novel pathogenicity island. *Infect Immun*  
783 74(1):744-749.
- 784 Karr JF, Nowicki B, Truong LD, Hull RA & Hull SI (1989) Purified P fimbriae from two  
785 cloned gene clusters of a single pyelonephritogenic strain adhere to unique structures  
786 in the human kidney. *Infect Immun* 57(11):3594-3600.
- 787 Khan NA, Kim Y, Shin S & Kim KS (2007) FimH-mediated *Escherichia coli* K1 invasion of  
788 human brain microvascular endothelial cells. *Cell Microbiol* 9(1):169-178.
- 789 Koraimann G (2018) Spread and Persistence of Virulence and Antibiotic Resistance Genes: A  
790 Ride on the F Plasmid Conjugation Module. *EcoSal Plus* 8(1).
- 791 Kuehn MJ, Heuser J, Normark S & Hultgren SJ (1992) P pili in uropathogenic *E. coli* are  
792 composite fibres with distinct fibrillar adhesive tips. *Nature* 356(6366):252-255.
- 793 Lanza VF, de Toro M, Garcillan-Barcia MP, Mora A, Blanco J, Coque TM & de la Cruz F  
794 (2014) Plasmid flux in *Escherichia coli* ST131 sublineages, analyzed by plasmid  
795 constellation network (PLACNET), a new method for plasmid reconstruction from  
796 whole genome sequences. *PLoS Genet* 10(12):e1004766.
- 797 Lee IPA & Andam CP (2019) Pan-genome diversification and recombination in *Cronobacter*  
798 *sakazakii*, an opportunistic pathogen in neonates, and insights to its xerotolerant  
799 lifestyle. *BMC Microbiol* 19(1):306.
- 800 Lillington J, Geibel S & Waksman G (2014) Biogenesis and adhesion of type 1 and P pili.  
801 *Biochim Biophys Acta* 1840(9):2783-2793.
- 802 Lindberg FP, Lund B & Normark S (1984) Genes of pyelonephritogenic *E. coli* required for  
803 digalactoside-specific agglutination of human cells. *EMBO J* 3(5):1167-1173.

- 804 Lindstedt R, Baker N, Falk P, Hull R, Hull S, Karr J, Leffler H, Svanborg Eden C & Larson G  
805 (1989) Binding specificities of wild-type and cloned *Escherichia coli* strains that  
806 recognize globo-A. *Infect Immun* 57(11):3389-3394.
- 807 Livak KJ & Schmittgen TD (2001) Analysis of relative gene expression data using real-time  
808 quantitative PCR and the 2<sup>-</sup>(Delta Delta C(T)) Method. *Methods* 25(4):402-408.
- 809 Lugering A, Benz I, Knochenhauer S, Ruffing M & Schmidt MA (2003) The Pix pilus  
810 adhesin of the uropathogenic *Escherichia coli* strain X2194 (O2 : K(-): H6) is related  
811 to Pap pili but exhibits a truncated regulatory region. *Microbiology (Reading)* 149(Pt  
812 6):1387-1397.
- 813 Lymberopoulos MH, Houle S, Daigle F, Leveille S, Bree A, Moulin-Schouleur M, Johnson  
814 JR & Dozois CM (2006) Characterization of Stg fimbriae from an avian pathogenic  
815 *Escherichia coli* O78:K80 strain and assessment of their contribution to colonization  
816 of the chicken respiratory tract. *J Bacteriol* 188(18):6449-6459.
- 817 Manning SD, Zhang L, Foxman B, Spindler A, Tallman P & Marrs CF (2001) Prevalence of  
818 known P-fimbrial G alleles in *Escherichia coli* and identification of a new adhesin  
819 class. *Clin Diagn Lab Immunol* 8(3):637-640.
- 820 Marc D & Dho-Moulin M (1996) Analysis of the *fim* cluster of an avian O2 strain of  
821 *Escherichia coli*: serogroup-specific sites within *fimA* and nucleotide sequence of *fimI*.  
822 *J Med Microbiol* 44(6):444-452.
- 823 Marklund BI, Tennent JM, Garcia E, Hamers A, Baga M, Lindberg F, Gaastra W & Normark  
824 S (1992) Horizontal gene transfer of the *Escherichia coli* *pap* and *prs* pili operons as a  
825 mechanism for the development of tissue-specific adhesive properties. *Mol Microbiol*  
826 6(16):2225-2242.
- 827 Matter LB, Barbieri NL, Nordhoff M, Ewers C & Horn F (2011) Avian pathogenic  
828 *Escherichia coli* MT78 invades chicken fibroblasts. *Vet Microbiol* 148(1):51-59.
- 829 Mellata M, Dho-Moulin M, Dozois CM, Curtiss R, 3rd, Lehoux B & Fairbrother JM (2003)  
830 Role of avian pathogenic *Escherichia coli* virulence factors in bacterial interaction  
831 with chicken heterophils and macrophages. *Infect Immun* 71(1):494-503.
- 832 Mobley HL, Green DM, Trifillis AL, Johnson DE, Chippendale GR, Lockett CV, Jones BD  
833 & Warren JW (1990) Pyelonephritogenic *Escherichia coli* and killing of cultured  
834 human renal proximal tubular epithelial cells: role of hemolysin in some strains. *Infect*  
835 *Immun* 58(5):1281-1289.
- 836 Mobley HL, Jarvis KG, Elwood JP, Whittle DI, Lockett CV, Russell RG, Johnson DE,  
837 Donnenberg MS & Warren JW (1993) Isogenic P-fimbrial deletion mutants of

- 838 pyelonephritogenic *Escherichia coli*: the role of alpha Gal(1-4) beta Gal binding in  
839 virulence of a wild-type strain. *Mol Microbiol* 10(1):143-155.
- 840 Nuccio SP & Baumler AJ (2007) Evolution of the chaperone/usher assembly pathway:  
841 fimbrial classification goes Greek. *Microbiol Mol Biol Rev* 71(4):551-575.
- 842 O'Hanley P, Lark D, Falkow S & Schoolnik G (1985) Molecular basis of *Escherichia coli*  
843 colonization of the upper urinary tract in BALB/c mice. Gal-Gal pili immunization  
844 prevents *Escherichia coli* pyelonephritis in the BALB/c mouse model of human  
845 pyelonephritis. *J Clin Invest* 75(2):347-360.
- 846 Plos K, Carter T, Hull S, Hull R & Svanborg Eden C (1990) Frequency and organization of  
847 pap homologous DNA in relation to clinical origin of uropathogenic *Escherichia coli*.  
848 *J Infect Dis* 161(3):518-524.
- 849 Provence DL & Curtiss 3rd R (1994) Isolation and characterization of a gene involved in  
850 hemagglutination by an avian pathogenic *Escherichia coli* strain. *Infection and*  
851 *immunity* 62(4):1369-1380.
- 852 Rice JC, Peng T, Spence JS, Wang HQ, Goldblum RM, Corthesy B & Nowicki BJ (2005)  
853 Pyelonephritic *Escherichia coli* expressing P fimbriae decrease immune response of  
854 the mouse kidney. *J Am Soc Nephrol* 16(12):3583-3591.
- 855 Roberts JA, Marklund BI, Ilver D, Haslam D, Kaack MB, Baskin G, Louis M, Mollby R,  
856 Winberg J & Normark S (1994) The Gal(alpha 1-4)Gal-specific tip adhesin of  
857 *Escherichia coli* P-fimbriae is needed for pyelonephritis to occur in the normal urinary  
858 tract. *Proc Natl Acad Sci U S A* 91(25):11889-11893.
- 859 Schneider G, Dobrindt U, Bruggemann H, Nagy G, Janke B, Blum-Oehler G, Buchrieser C,  
860 Gottschalk G, Emody L & Hacker J (2004) The pathogenicity island-associated K15  
861 capsule determinant exhibits a novel genetic structure and correlates with virulence in  
862 uropathogenic *Escherichia coli* strain 536. *Infect Immun* 72(10):5993-6001.
- 863 Sokurenko EV, Courtney HS, Abraham SN, Klemm P & Hasty DL (1992) Functional  
864 heterogeneity of type 1 fimbriae of *Escherichia coli*. *Infect Immun* 60(11):4709-4719.
- 865 Soto GE & Hultgren SJ (1999) Bacterial adhesins: common themes and variations in  
866 architecture and assembly. *J Bacteriol* 181(4):1059-1071.
- 867 Stromberg N, Marklund BI, Lund B, Ilver D, Hamers A, Gaastra W, Karlsson KA & Normark  
868 S (1990) Host-specificity of uropathogenic *Escherichia coli* depends on differences in  
869 binding specificity to Gal alpha 1-4Gal-containing isoreceptors. *EMBO J* 9(6):2001-  
870 2010.

- 871 van den Bosch JF, Hendriks JH, Gladigau I, Willems HM, Storm PK & de Graaf FK (1993)  
872 Identification of F11 fimbriae on chicken *Escherichia coli* strains. *Infect Immun*  
873 61(3):800-806.
- 874 Werneburg GT & Thanassi DG (2018) Pili Assembled by the Chaperone/Usher Pathway in  
875 *Escherichia coli* and *Salmonella*. *EcoSal Plus* 8(1).
- 876 Woodall LD, Russell PW, Harris SL & Orndorff PE (1993) Rapid, synchronous, and stable  
877 induction of type 1 piliation in *Escherichia coli* by using a chromosomal lacUV5  
878 promoter. *J Bacteriol* 175(9):2770-2778.
- 879 Wurpel DJ, Beatson SA, Totsika M, Petty NK & Schembri MA (2013) Chaperone-usher  
880 fimbriae of *Escherichia coli*. *PLoS One* 8(1):e52835.
- 881

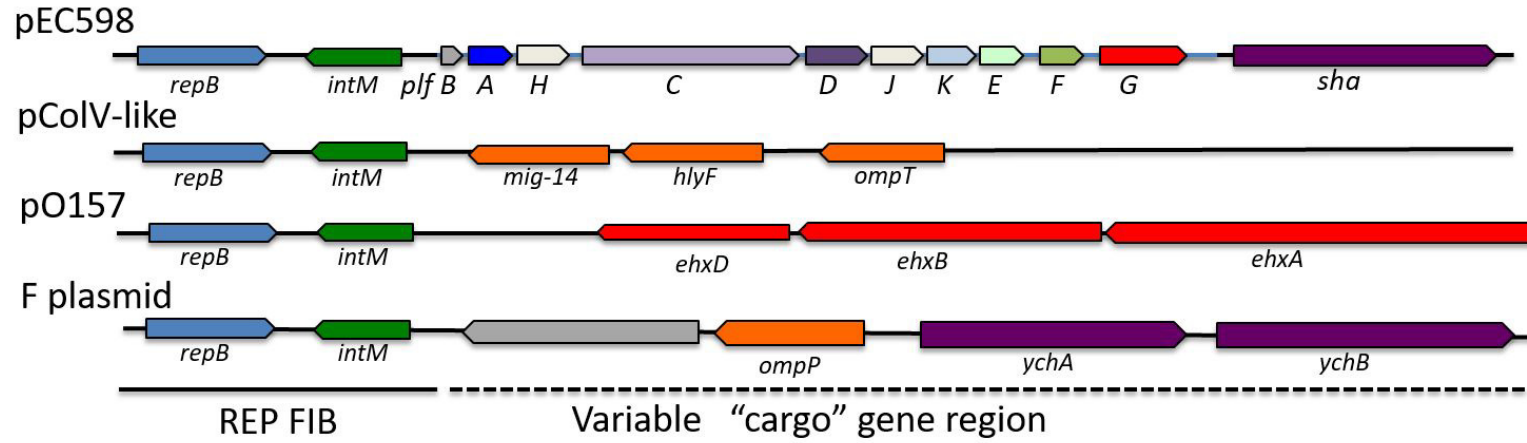



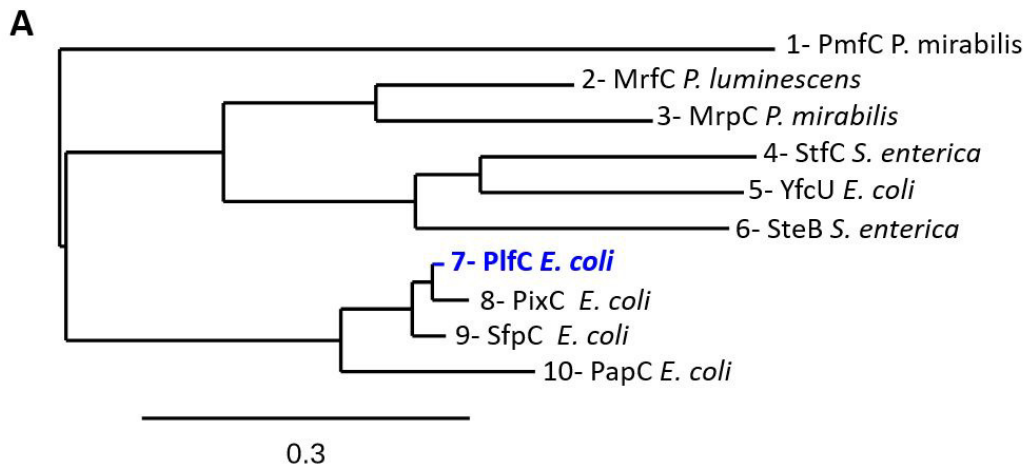

**B**

|                                    |                                      |
|------------------------------------|--------------------------------------|
| <b>PlfA</b> - <i>E. coli</i> QT598 | Q G Q G K V T F N G T V I D A P      |
| PapA (F13)- <i>E. coli</i> J96     | Q G Q G K V N F K G T V V D A P      |
| PapA (F11)- <i>E. coli</i> APECO1  | Q G Q G K V T F N G T V V D A P      |
| PapA (F9)- <i>E. coli</i> 3669     | Q G S G Q V N F K G T V I D A P      |
| PixA- <i>E. coli</i> 536           | Q G Q G V V N F K G T V I D A P      |
| SfpA- <i>E. coli</i> O157          | Q G Q G I I N F K G I I I N A P      |
| MrpA- <i>P. mirabilis</i>          | Q G H G T V K F V G S I I D A P      |
| SmfA- <i>S. marcescens</i>         | Q G H G K V T F T G S I I D A P      |
|                                    | <b>G x G x V x F x G T V I D A P</b> |
|                                    | S I V                                |

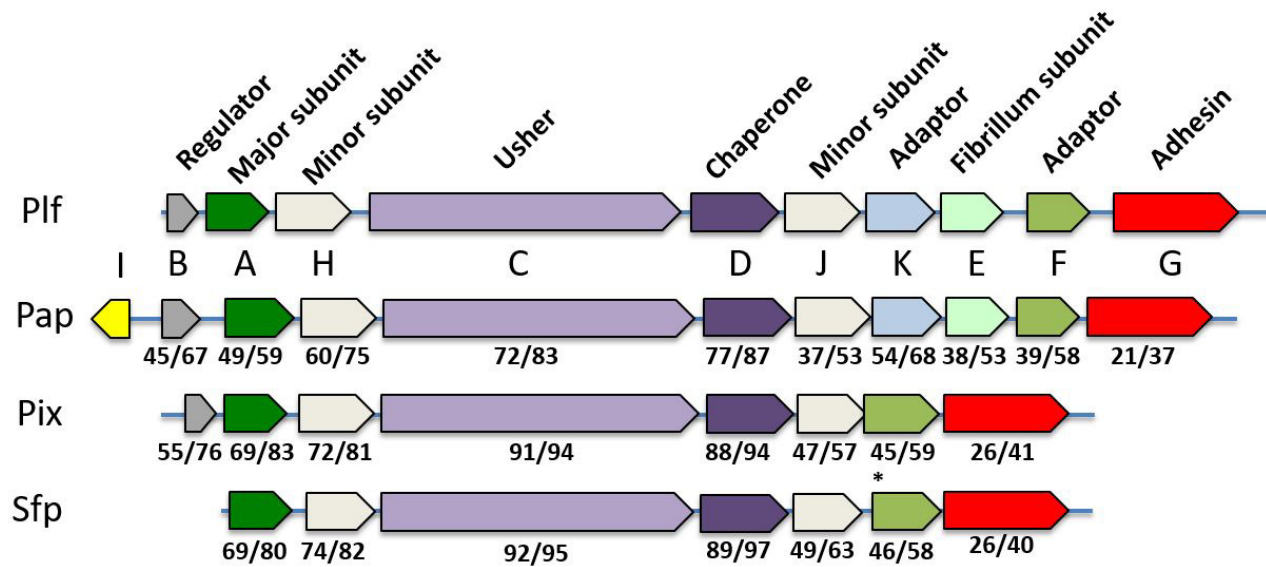

# PfG adhesin diversity

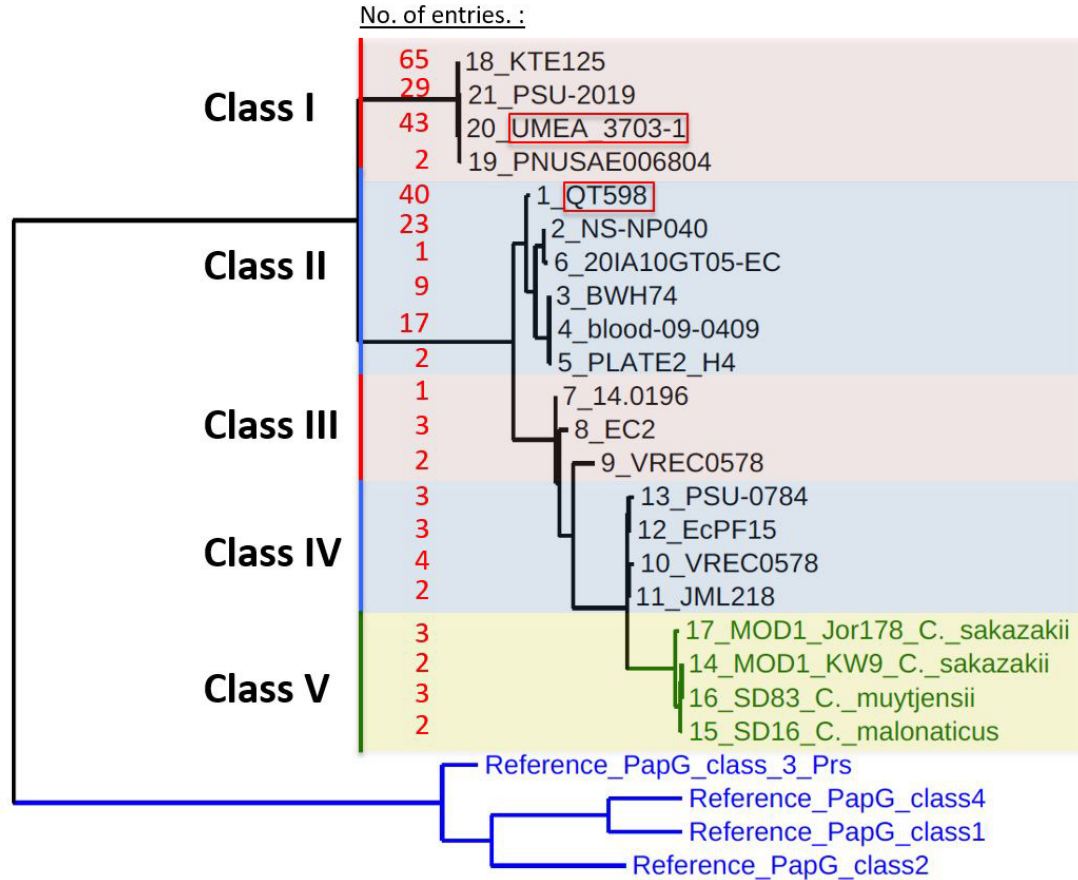

**A.** Empty vector

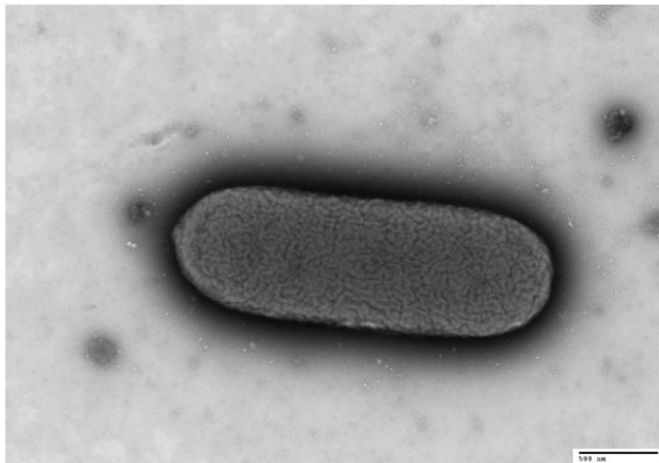

**B.** Plf<sub>QT598</sub>

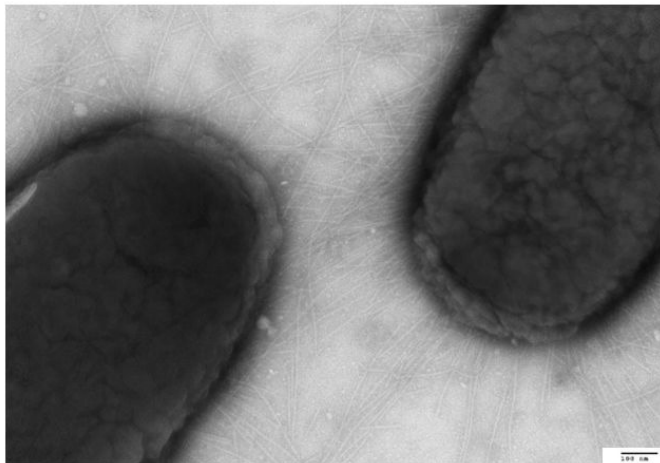

**C.** Plf<sub>UMEA-3703-1</sub>

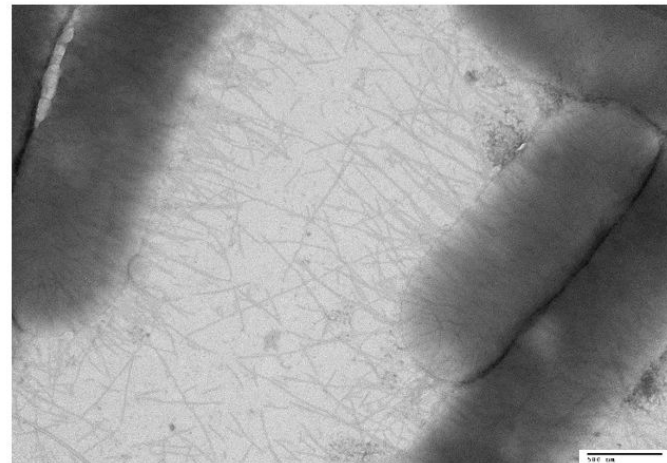

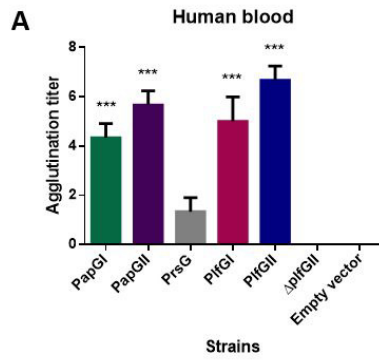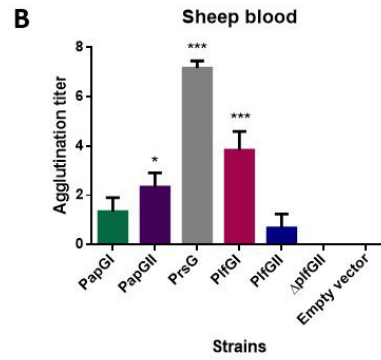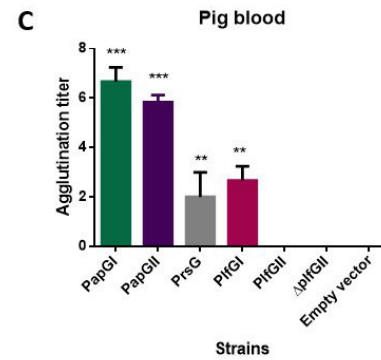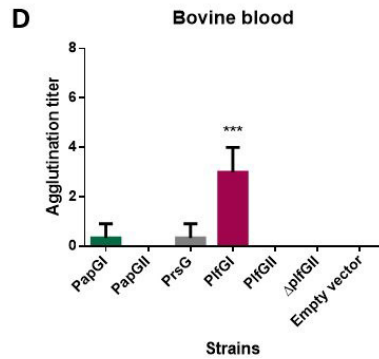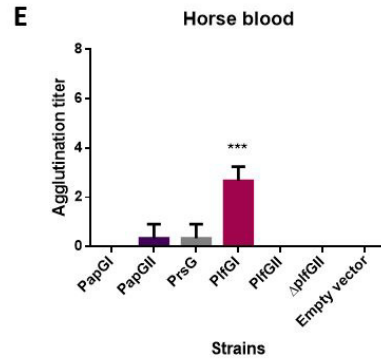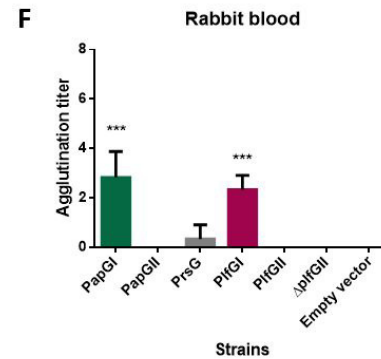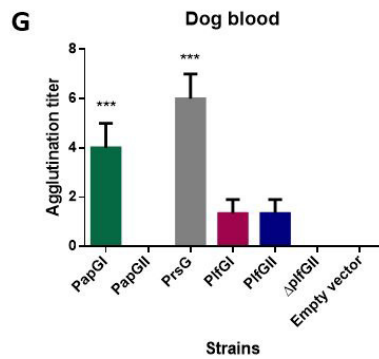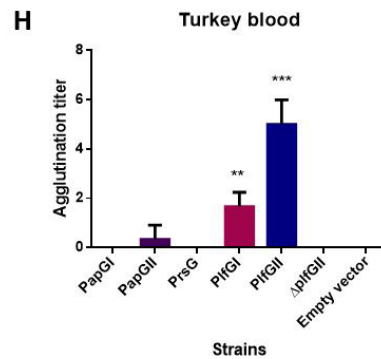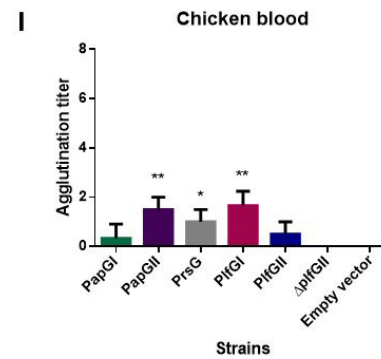

## A Electron microscopy

1- Empty vector

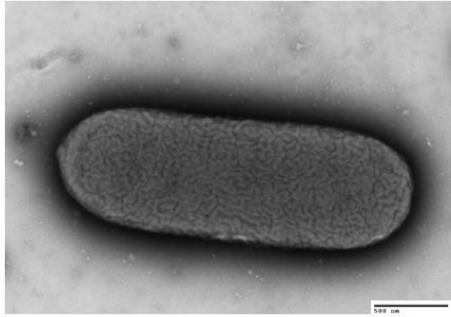

2- *plf*<sub>QT598</sub>

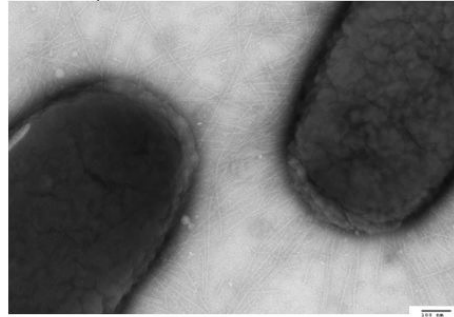

3- *plf*<sub>QT598</sub> :: *papGI*

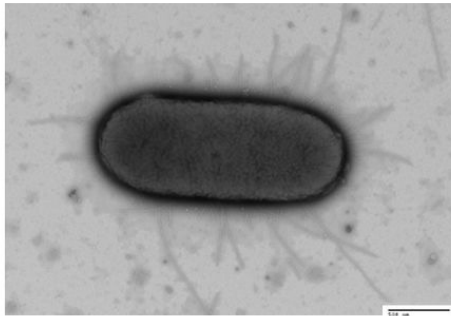

4- *plf*<sub>QT598</sub> :: *papGII*

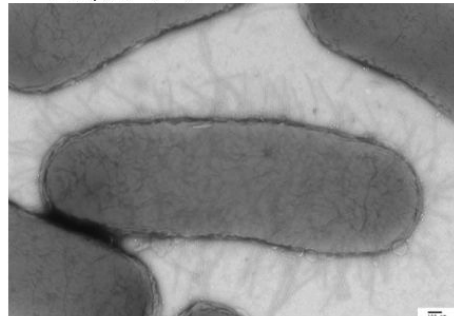

5- *plf*<sub>QT598</sub> :: *prsG*

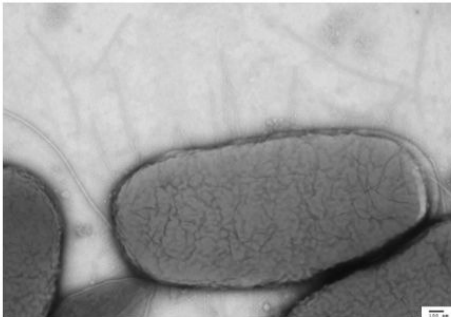

6- *plf*<sub>QT598</sub> :: *plfGI*

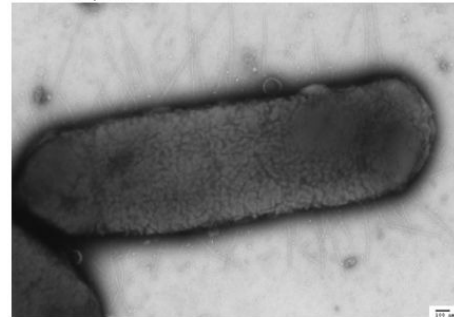

## B Western Blot

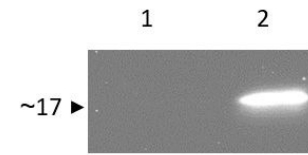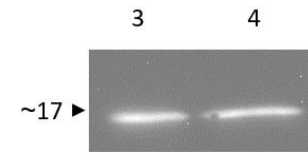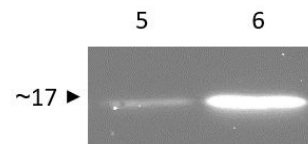

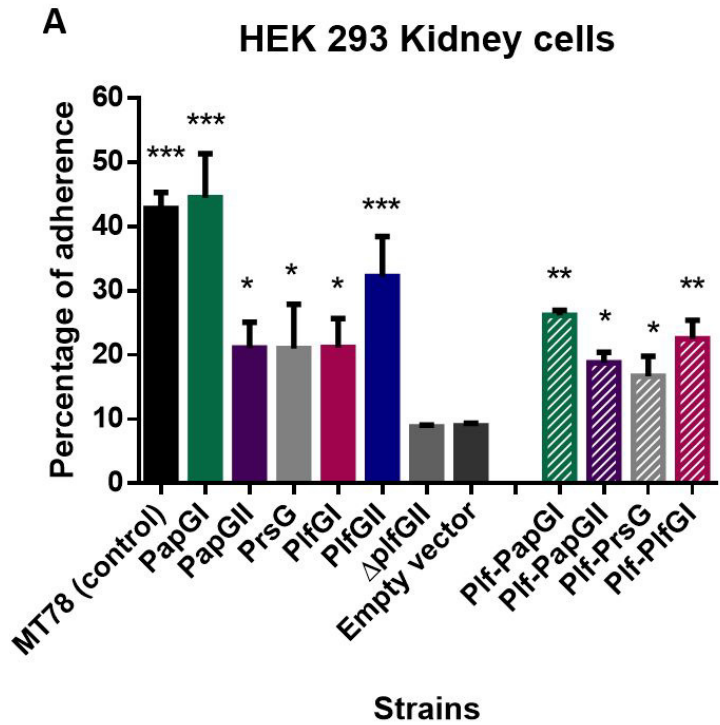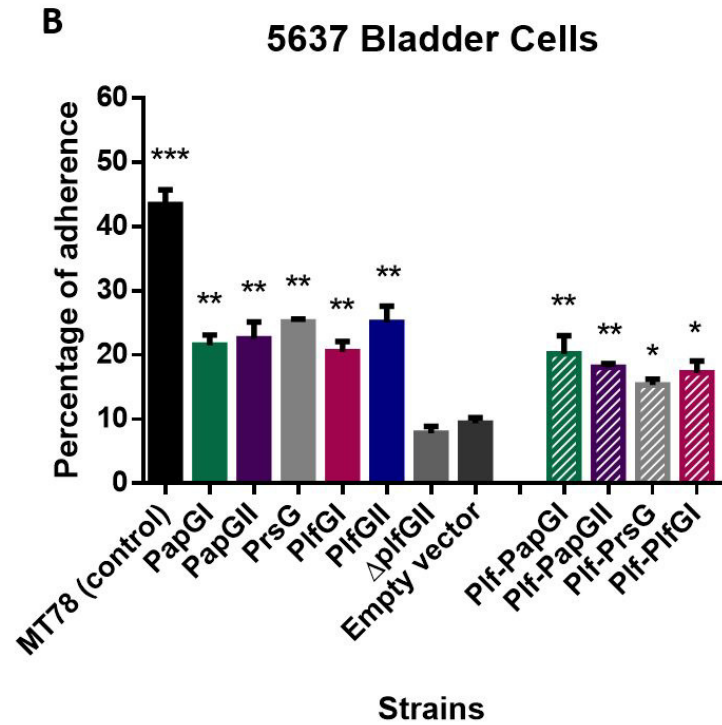

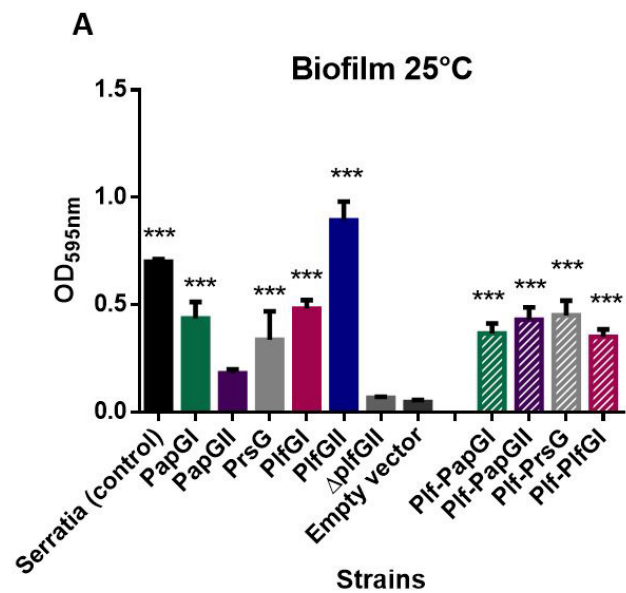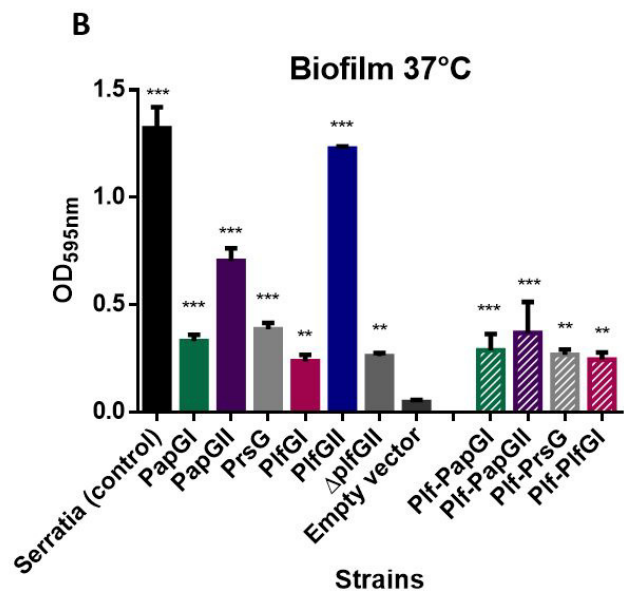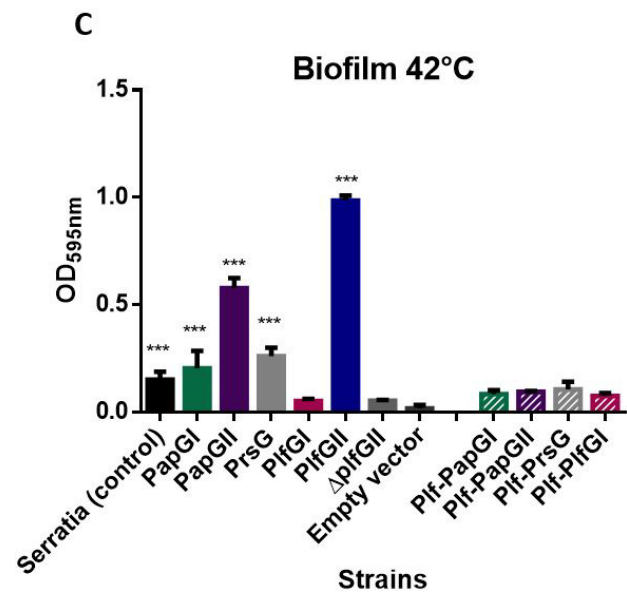



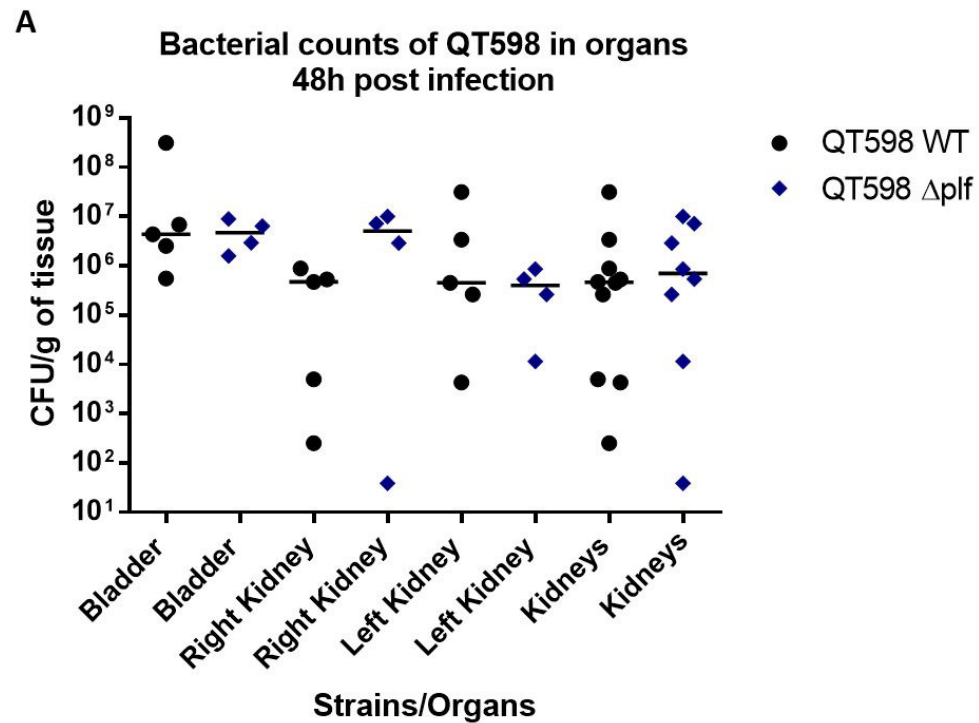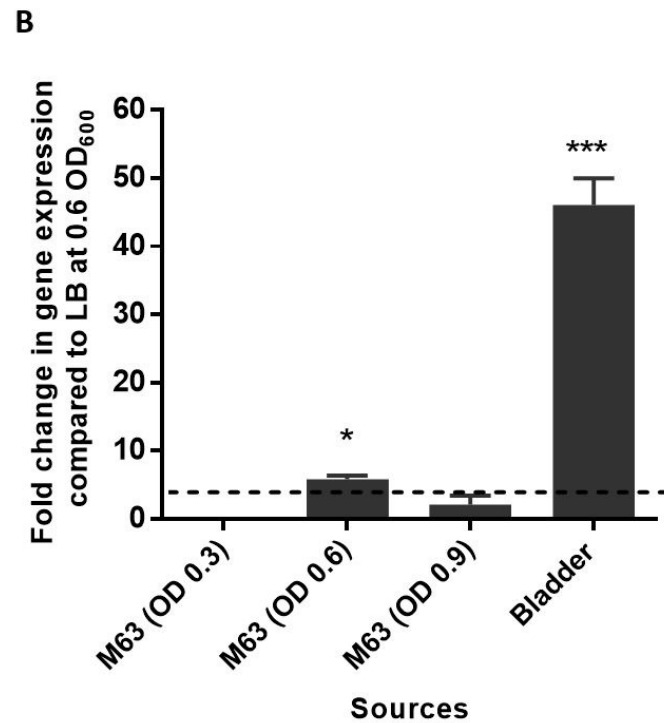

**Table 1. Plasmids and Strains used in this study**

| <b>Plasmids</b> | <b>Characteristic(s)</b>                                                                                                                                                                                      | <b>References</b>                                              |
|-----------------|---------------------------------------------------------------------------------------------------------------------------------------------------------------------------------------------------------------|----------------------------------------------------------------|
| pKD4            | Plasmid used for amplification of <i>kan</i> cassette                                                                                                                                                         | (Datsenko <i>et al.</i> , 2000)                                |
| pKD13           | Plasmid used for amplification of <i>kan</i> cassette                                                                                                                                                         | (Datsenko <i>et al.</i> , 2000)                                |
| pKD46           | $\lambda$ Red plasmid; Amp <sup>r</sup>                                                                                                                                                                       | (Datsenko <i>et al.</i> , 2000)                                |
| pUCmT           | Cloning vector; Amp <sup>r</sup>                                                                                                                                                                              | Bio Basic Inc.                                                 |
| pBC sk+         | Cloning vector; Cm <sup>r</sup>                                                                                                                                                                               | Stratagene, La Jolla, CA                                       |
| pPap5           | Pap fimbriae expressing PapGI from J96                                                                                                                                                                        | (Hull <i>et al.</i> , 1981,<br>Lindberg <i>et al.</i> , 1984)  |
| pDC5            | Pap fimbriae expressing PapGII from IA2                                                                                                                                                                       | (Clegg, 1982)                                                  |
| pJFK102         | Pap fimbriae expressing PrsG from J96                                                                                                                                                                         | (Karr <i>et al.</i> , 1989,<br>Lindstedt <i>et al.</i> , 1989) |
| pIJ507          | pUCmT:: <i>plf</i> <sub>QT598</sub>                                                                                                                                                                           | This study                                                     |
| pIJ523          | pBC sk+:: <i>plf</i> <sub>UMEA-3703-01</sub>                                                                                                                                                                  | This study                                                     |
| pIJ594          | pUCmT:: <i>plf</i> <sub>QT598</sub> - <i>papGI</i>                                                                                                                                                            | This study                                                     |
| pIJ595          | pUCmT:: <i>plf</i> <sub>QT598</sub> - <i>papGII</i>                                                                                                                                                           | This study                                                     |
| pIJ596          | pUCmT:: <i>plf</i> <sub>QT598</sub> - <i>prsG</i>                                                                                                                                                             | This study                                                     |
| pIJ597          | pUCmT:: <i>plf</i> <sub>QT598</sub> - <i>plfGI</i>                                                                                                                                                            | This study                                                     |
| pIJ598          | pUCmT:: <i>plf</i> <sub>QT598</sub> - $\Delta$ <i>plfGII</i>                                                                                                                                                  | This study                                                     |
| <b>Strains</b>  |                                                                                                                                                                                                               |                                                                |
| ORN172          | <i>fim</i> negative strain<br><i>thr-1 leuB thi-1</i> $\Delta$ ( <i>argF-lac</i> )U169 <i>xyl-7 ara-13</i><br><i>mtl-2 gal-6 rpsL tonA2</i><br><i>supE44</i> $\Delta$ ( <i>fimBEACDFGH</i> )::Km <i>pilG1</i> | (Woodall <i>et al.</i> , 1993)                                 |
| MT78            | APEC O2:H <sup>+</sup> :K1, ST95                                                                                                                                                                              | (Dho <i>et al.</i> , 1982)                                     |
| QT2799          | <i>Serratia liquefaciens</i>                                                                                                                                                                                  | ATCC27592                                                      |
| QT598           | APEC O1:K1, ST1385                                                                                                                                                                                            | (Habouria <i>et al.</i> , 2019,<br>Marc <i>et al.</i> , 1996)  |

|                         |                                                                   |                               |
|-------------------------|-------------------------------------------------------------------|-------------------------------|
| QT4420                  | QT598 $\Delta plf$ , Km <sup>R</sup>                              | This study                    |
| UMEA-3703-1             | UPEC strain, urine of patient with bacteremia                     | NCBI Biosample : SAMN01885978 |
| QT4598                  | UMEA-3703-1 $\Delta plf$ , Km <sup>R</sup>                        | This study                    |
| <b>Reference Clones</b> |                                                                   |                               |
| QT5722                  | ORN172/ pPap5 (reference clone expressing <i>papGI</i> from J96)  | This study                    |
| QT5723                  | ORN172/ pDC5 (reference clone expressing <i>papGII</i> from IA2)  | This study                    |
| QT5724                  | ORN172/ pJFK102 (reference clone expressing <i>prsG</i> from J96) | This study                    |
| QT4741                  | ORN172/ pIJ523 (reference clone expressing <i>plfGI</i> )         | This study                    |
| QT5726                  | ORN172/ pIJ507 (reference clone expressing <i>plfGII</i> )        | This study                    |
| QT5727                  | ORN172/ pIJ598 (reference clone expressing $\Delta plfGII$ )      | This study                    |
| QT5732                  | ORN172/ pUCmT empty vector                                        | This study                    |
| <b>Chimeric clones</b>  |                                                                   |                               |
| QT5728                  | ORN172/ pIJ594 (chimeric clone expressing <i>papGI</i> )          | This study                    |
| QT5729                  | ORN172/ pIJ595 (chimeric clone expressing <i>papGII</i> )         | This study                    |
| QT5730                  | ORN172/ pIJ596 (chimeric clone expressing <i>prsG</i> )           | This study                    |
| QT5731                  | ORN172/ pIJ597 (chimeric clone expressing <i>plfGI</i> )          | This study                    |

**Table 2. Primers used in this study**

| <b>Primers</b> | <b>Characteristics</b>                      | <b>Sequence</b>                                                     |
|----------------|---------------------------------------------|---------------------------------------------------------------------|
| <b>CMD1847</b> | Plf <sub>QT598</sub> _ cloning _F           | AGCTTAGCGGCCGCATCCGCACAAAC<br>GGTCTTAC                              |
| <b>CMD1900</b> | Plf <sub>QT598</sub> _ cloning/screening _R | ATGAACGGGCCCACCCGACATGAAC<br>ATTCTCC                                |
| <b>CMD2119</b> | Plf <sub>UMEA-3703-01</sub> _ cloning _F    | TCCCCGGGCTGCAGGAATTCGAGGG<br>AGGGCGTGAATTCTG                        |
| <b>CMD2120</b> | Plf <sub>UMEA-3703-1</sub> _ cloning _R     | GGCGAATTGGGTACCGGGCCCTCTGC<br>AGATGTCACCG                           |
| <b>CMD2171</b> | PapGI <sub>J96</sub> _ cloning _F           | CGATGATGTAAGGTTTATGAAAAAAT<br>GGTCCCTGCTT                           |
| <b>CMD2172</b> | PapGI <sub>J96</sub> _ cloning _R           | CATAATAAAAATGTTTTTCAGGGGAAA<br>CTCAGAACCA                           |
| <b>CMD2174</b> | PapGII <sub>CFT073</sub> _ cloning _F       | CGATGATGTAAGGTTTATGAAAAAAT<br>GGTCCCAGCTTTG                         |
| <b>CMD2175</b> | PapGII <sub>CFT073</sub> _ cloning _R       | CATAATAAAAATGTTTTTATGGCAAT<br>ATCATGAGCAGC                          |
| <b>CMD2177</b> | PrsG <sub>J96</sub> _ cloning _F            | CGATGATGTAAGGTTTATGAAAAAAT<br>GGCTCCCTGC                            |
| <b>CMD2178</b> | PrsG <sub>J96</sub> _ cloning _R            | CATAATAAAAATGTTTTTATGGCAAT<br>ATCATGAGCAGCG                         |
| <b>CMD2180</b> | PlfGI <sub>UMEA-3703-1</sub> _ cloning _F   | CGATGATGTAAGGTTTATGAAAAGAG<br>TTATCCTTTTGCTATTG                     |
| <b>CMD2181</b> | PlfGI <sub>UMEA-3703-1</sub> _ cloning _R   | CATAATAAAAATGTTTTCAATTAATA<br>TCAACCTTTAAAACAGCGC                   |
| <b>CMD2168</b> | Delete PlfGII <sub>QT598</sub> _KO_F        | ACGCTAACTCACGTTTAAACATTTTT<br>ATTATGATGTTAAAATATTTGTGTCG<br>CCTTTTG |
| <b>CMD2169</b> | Delete PlfGII <sub>QT598</sub> _KO_R        | AAACGTGAGTTAGCGTTTAAACCTTA<br>CATCATCGGATCATAAAAAAACGCAC<br>GCGTGAC |

|                |                                        |                                                                                |
|----------------|----------------------------------------|--------------------------------------------------------------------------------|
| <b>CMD2112</b> | Plf <sub>QT598/UMEA-3703-1_KO_F</sub>  | AGTAATAACTGACAGGATATTTTAAC<br>TATAATCAGGAGGTTATTTCCATGGT<br>GTAGGCTGGAGCTGCTTC |
| <b>CMD2113</b> | Plf <sub>QT598_KO_R</sub>              | CCCGACATGAACATTCTCCAGACTAT<br>ATTACAGGAGAATTCACCAGTTCCAT<br>GGGAATTAGCCATGGTCC |
| <b>CMD2114</b> | Plf <sub>UMEA-3703-1_KO_R</sub>        | TGCTACGTGCCATCTCATGCTCTTTAC<br>TTTCTCTCTTGGTTAATATCAAAATGG<br>GAATTAGCCATGGTCC |
| <b>CMD1849</b> | Plf <sub>QT598_screening_F</sub>       | AGATGGGATCCACAAACACAAGGTC<br>GCTCAGGG C                                        |
| <b>CMD2115</b> | Plf <sub>UMEA-3703-1_screening_F</sub> | ATGTCCGTTGAGCACTTTTCG                                                          |
| <b>CMD2116</b> | Plf <sub>UMEA-3703-1_screening_R</sub> | TGAAATCACCCCTATGCACA                                                           |
| <b>CMD2186</b> | qPCR PlfA _F                           | CGGATCAGGGACAAGGTAAAG                                                          |
| <b>CMD2187</b> | qPCR PlfA _R                           | CAGCCAGATGAGCTTTGG                                                             |
